# Supplementary material
Source: publisher figshare collection journal article supplement (https://tandf.figshare.com/ndownloader/files/12382310)

**Supporting Information**

**Two pairs of phenylpropanoid enantiomers from the leaves of *Eucommia ulmoides***

Xu-Liu Shi a,b,c †, Jian-Kun Yan a,d †, Wen-Kai Li a,b,c †, Paul Owusu Donkora,b,c, Xiu-Mei Gao a,b,c, Li-Qin Ding a,b,c* and Feng Qiua,b,c *

*aSchool of Chinese Materia Medica, Tianjin University of Traditional Chinese Medicine, Tianjin 300110, China;*

*bTianjin State Key Laboratory of Modern Chinese Medicine, Tianjin University of Traditional Chinese Medicine, Tianjin 300110, China;*

*ckey Laboratory of Pharmacology of Traditional Chinese Medicine Formulae, Ministry of Education, Tianjin 300110, China;*

*dCollege of Science and Technology, Agricultural University of Hebei, Cangzhou 061100, China*

†Xu-Liu Shi, Jian-Kun Yan andWen-Kai Licontributed equally to this work.

*Corresponding author. E-mail: fengqiu20070118@163.com (F. Qiu), ruby70303@163.com (LQ. Ding).

**Contents:**

**S1** HR-ESIMS of **1**

**S2** UV of **1**

**S3** IR of **1**

**S4** 1H NMR Spectrum of **1** in CD3OD

**S5** 13C NMR Spectrum of **1** in CD3OD

**S6** NOESY Spectrum of **1** in CD3OD

**S7** HSQC Spectrum of **1** in CD3OD

**S8** HMBC Spectrum of **1** in CD3OD

**S9** ICD data of **1a**

**S10** ICD data of **1b**

**S11** HR-ESIMS of **2**

**S12** UV of **2**

**S13** IR of **2**

**S14** 1H NMR Spectrum of **2** in CD3OD

**S15** 13C NMR Spectrum of **2** in CD3OD

**S16** NOESY Spectrum of **2** in CD3OD

**S17** HSQC Spectrum of **2** in CD3OD

**S18** HMBC Spectrum of **2** in CD3OD

**S19** ICD data of **2a**

**S20** ICD data of **2b**

**S21** Chiral seperation of **1**

**S22** Chiral seperation of **2**

**S23** 1H NMR Spectrum of **1** in Acetone-*d6*

**S24** 1H NMR Spectrum of **2** in Acetone-*d6*

**S25** 1H NMR Spectrum of **1** in D2O

**S26** 1H NMR Spectrum of **2** in D2O

**S27** 1H NMR Spectrum of **1** in DMSO-*d6*

**S28** 1H NMR Spectrum of **2** in DMSO-*d6*

**S29** 1H NMR Spectrum of **1** in Pyridine-*d5*

**S30** 1H NMR Spectrum of **2** in Pyridine-*d5*

**S1** HR-ESIMS of **1**

**
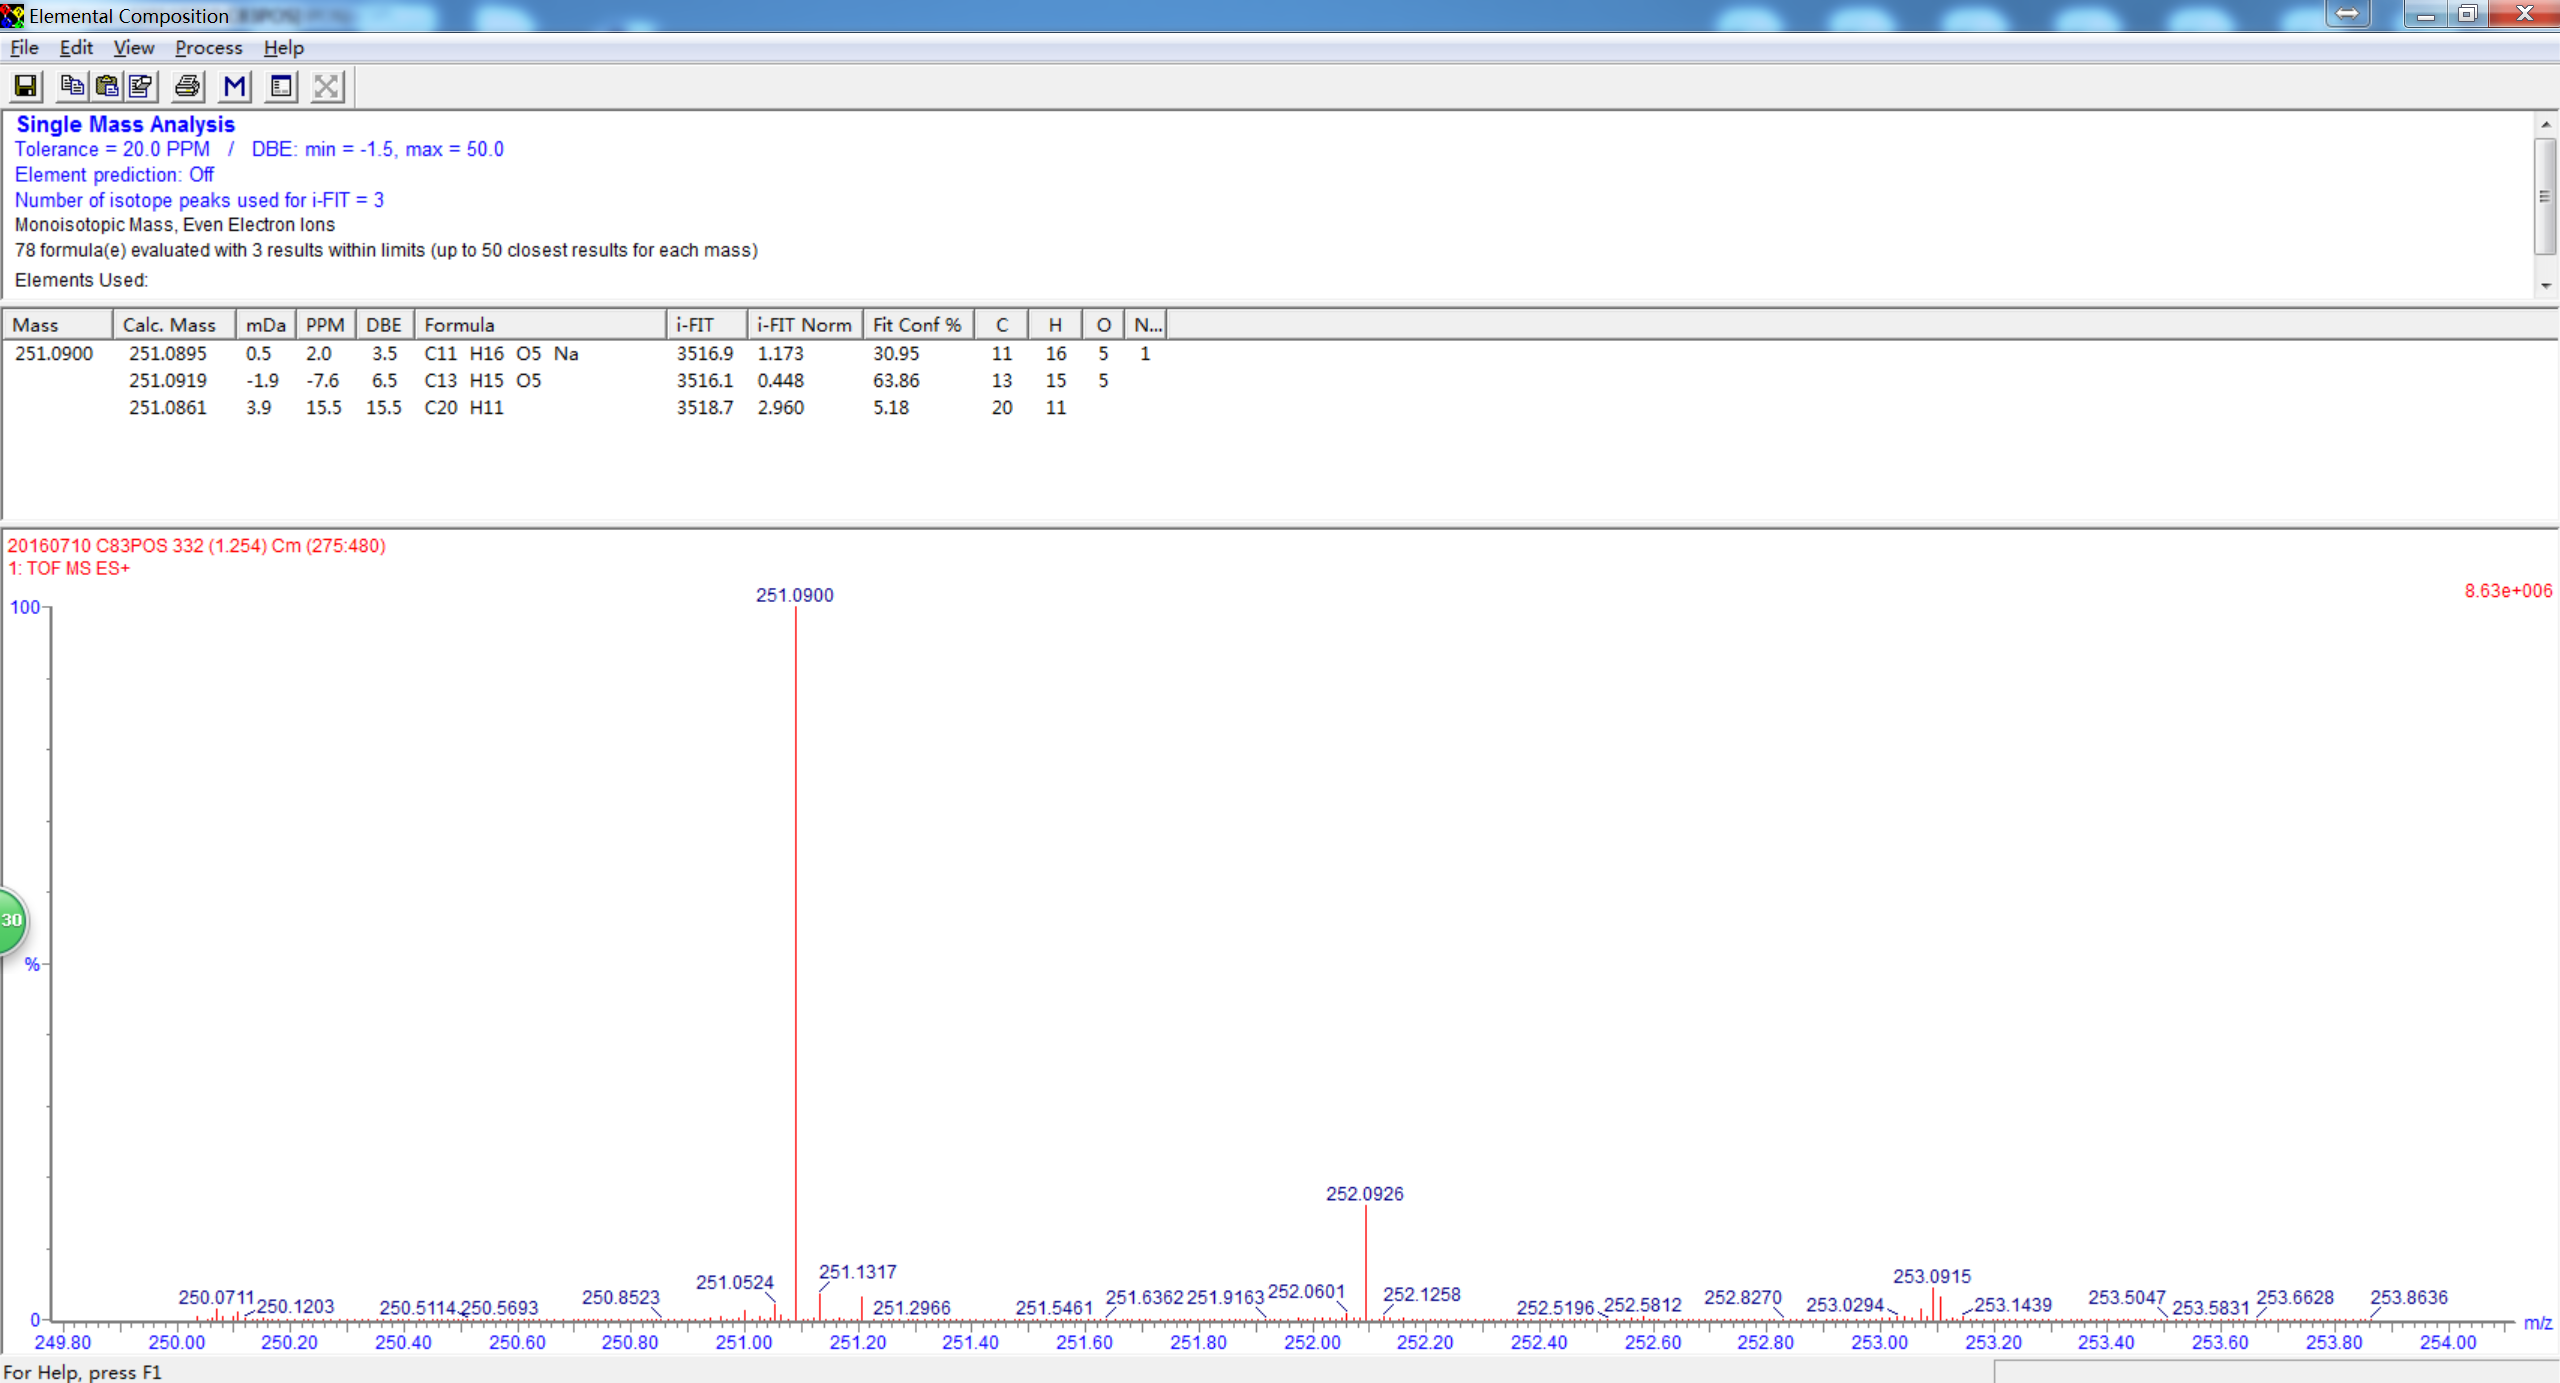
**

**S2** UV of **1**

**
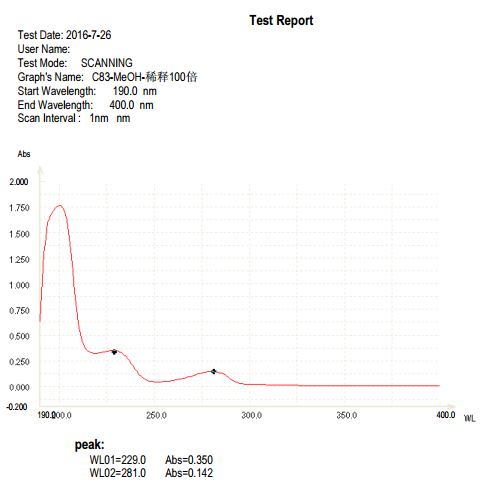
**

**S3** IR of **1**

**
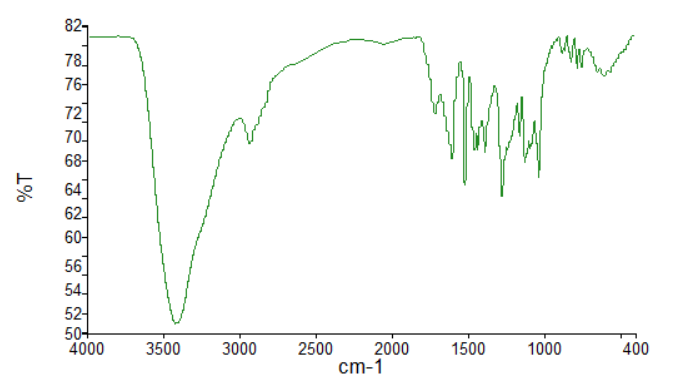
**

**S4** 1H NMR Spectrum of **1** in CD3OD


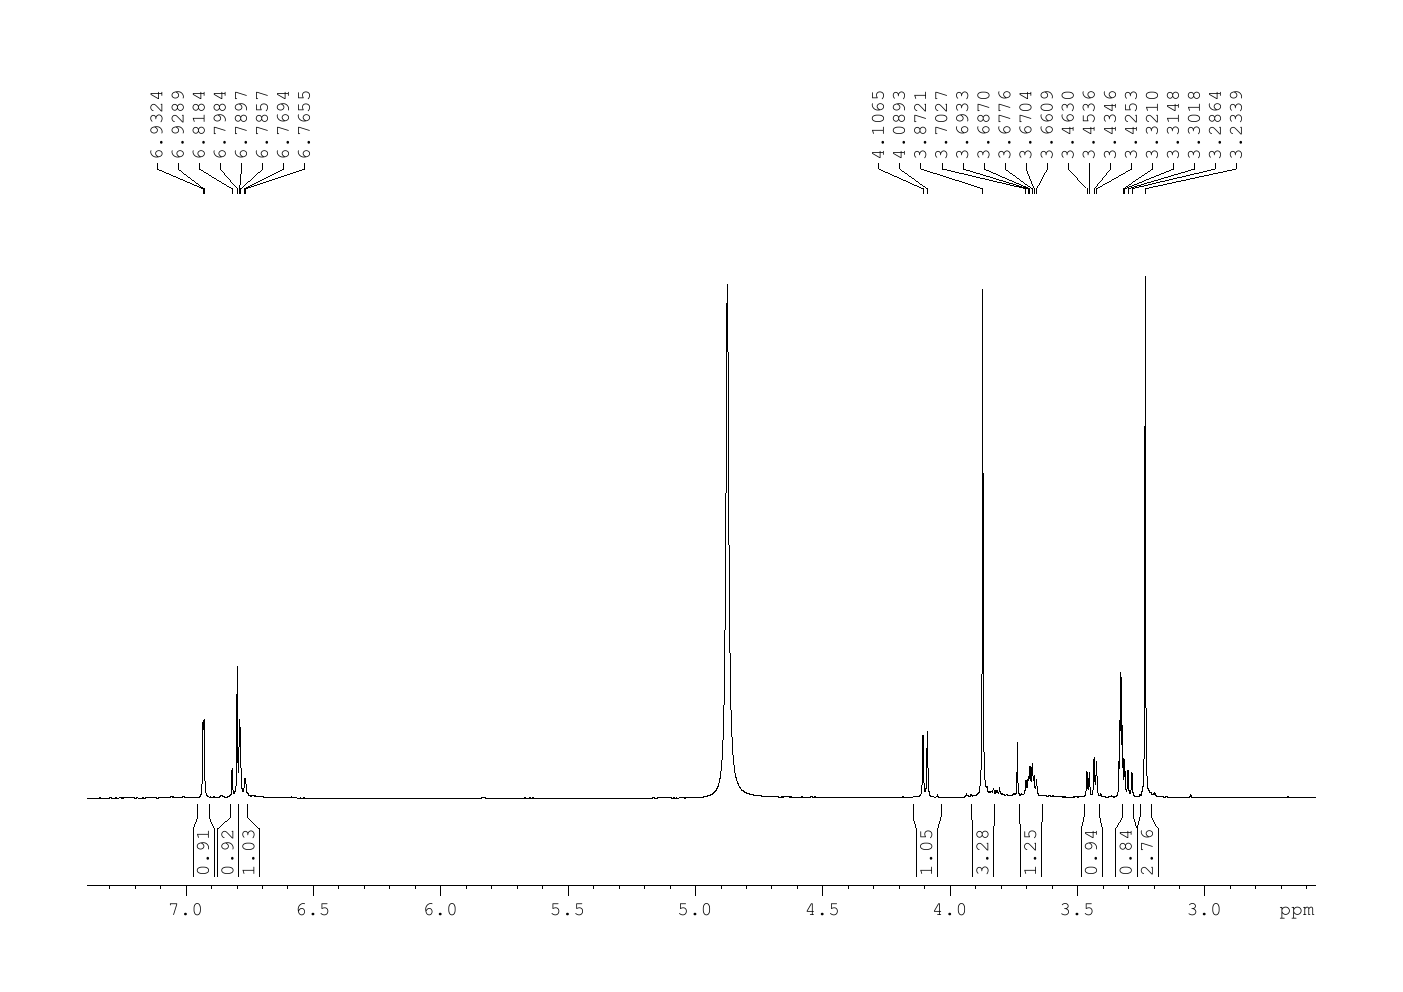


**S5** 13C NMR Spectrum of **1** in CD3OD


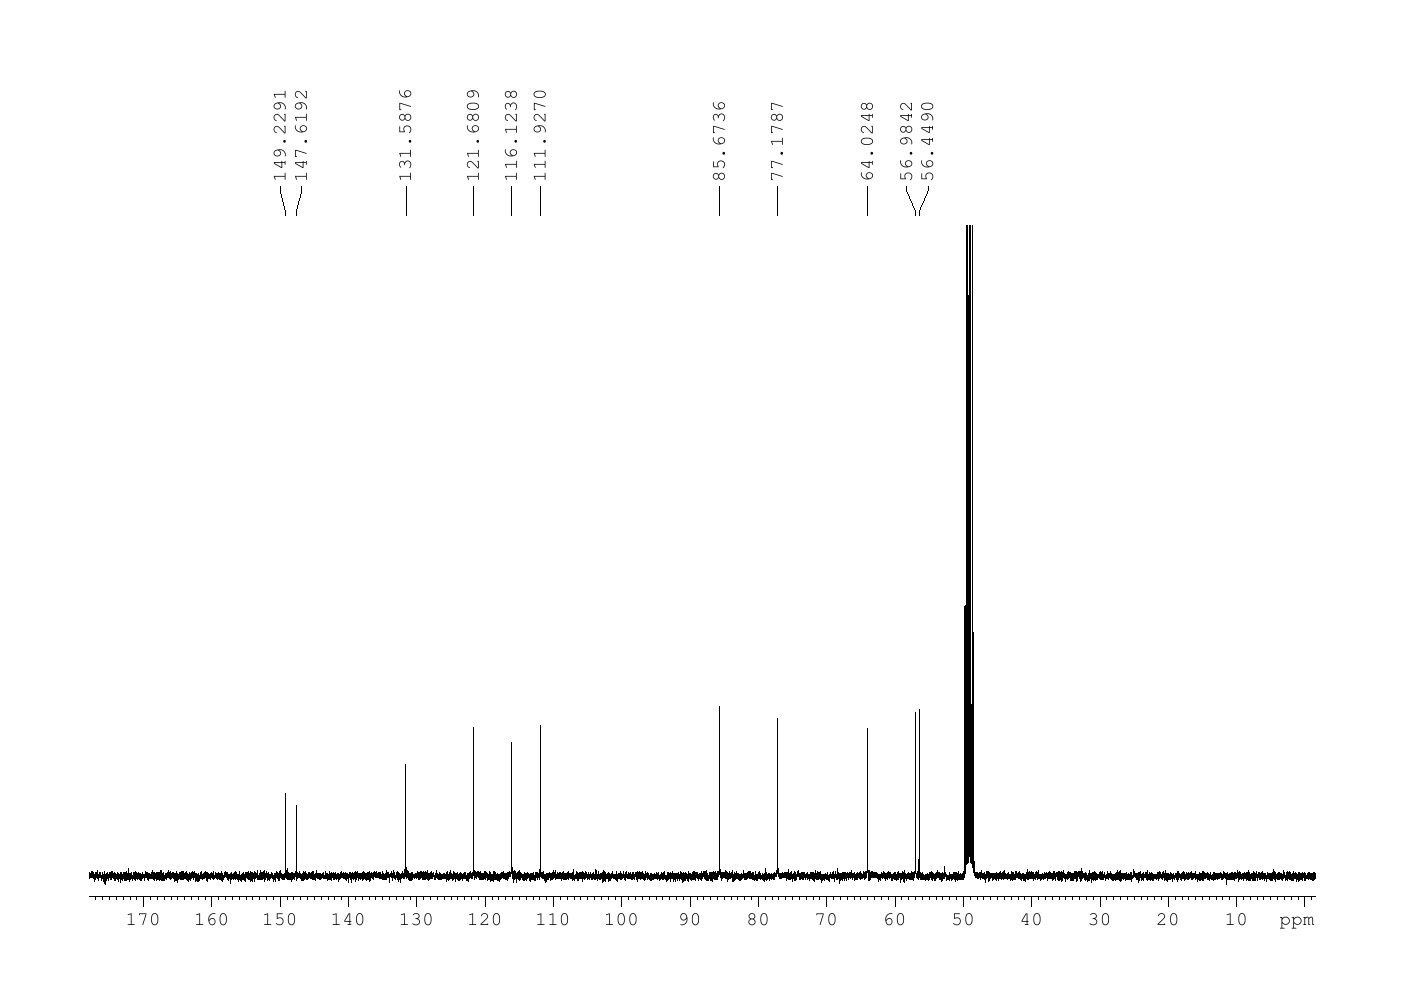


**S6** NOESY Spectrum of **1** in CD3OD


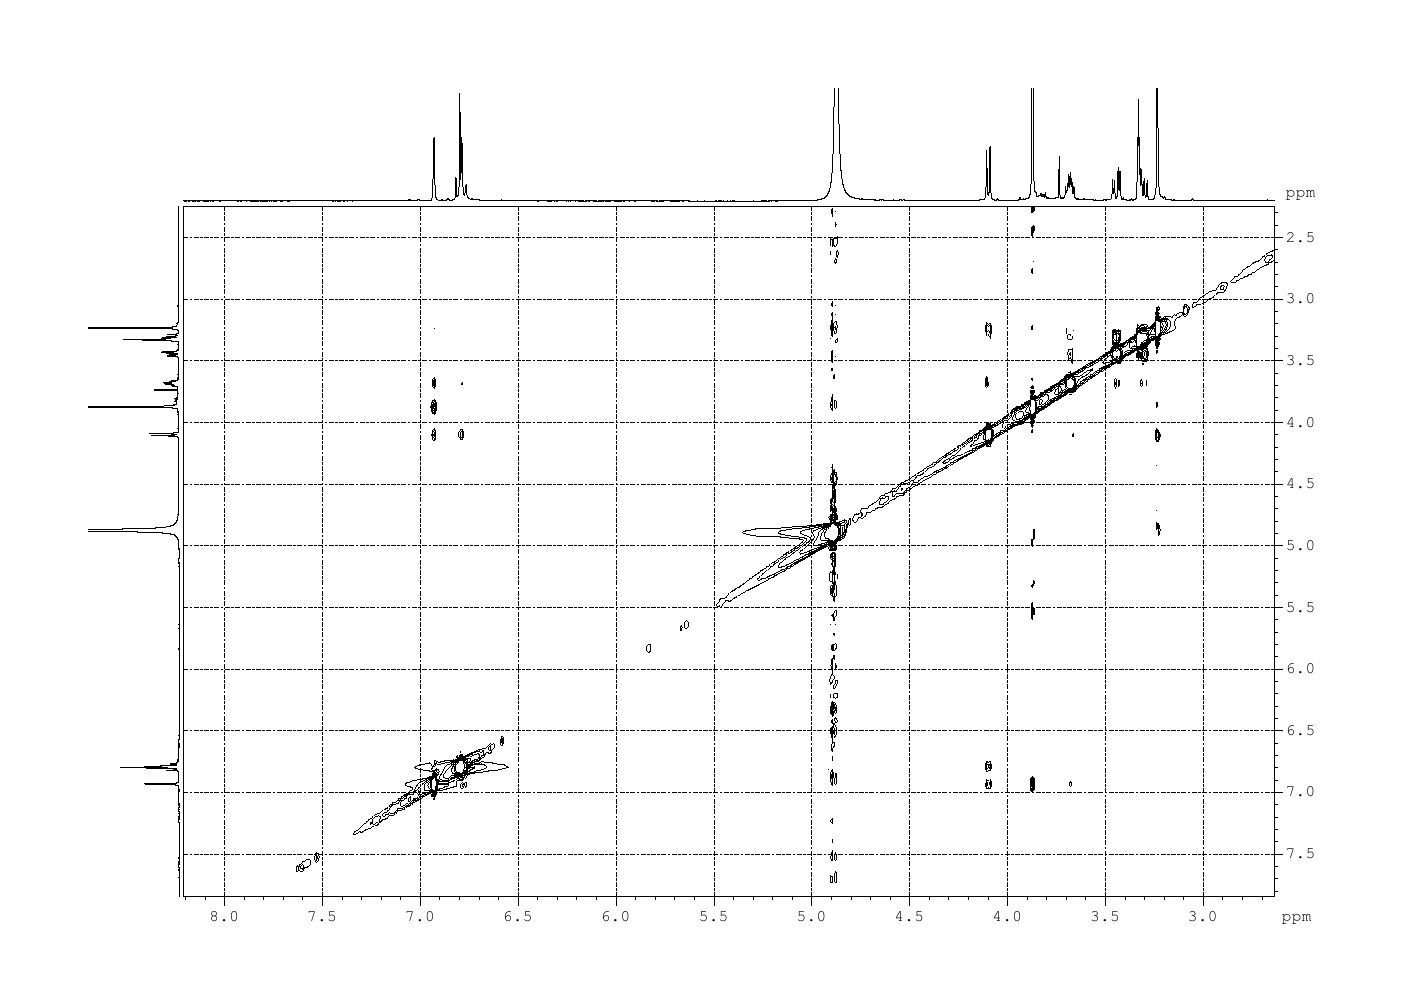


**S7** HSQC Spectrum of **1** in CD3OD

**
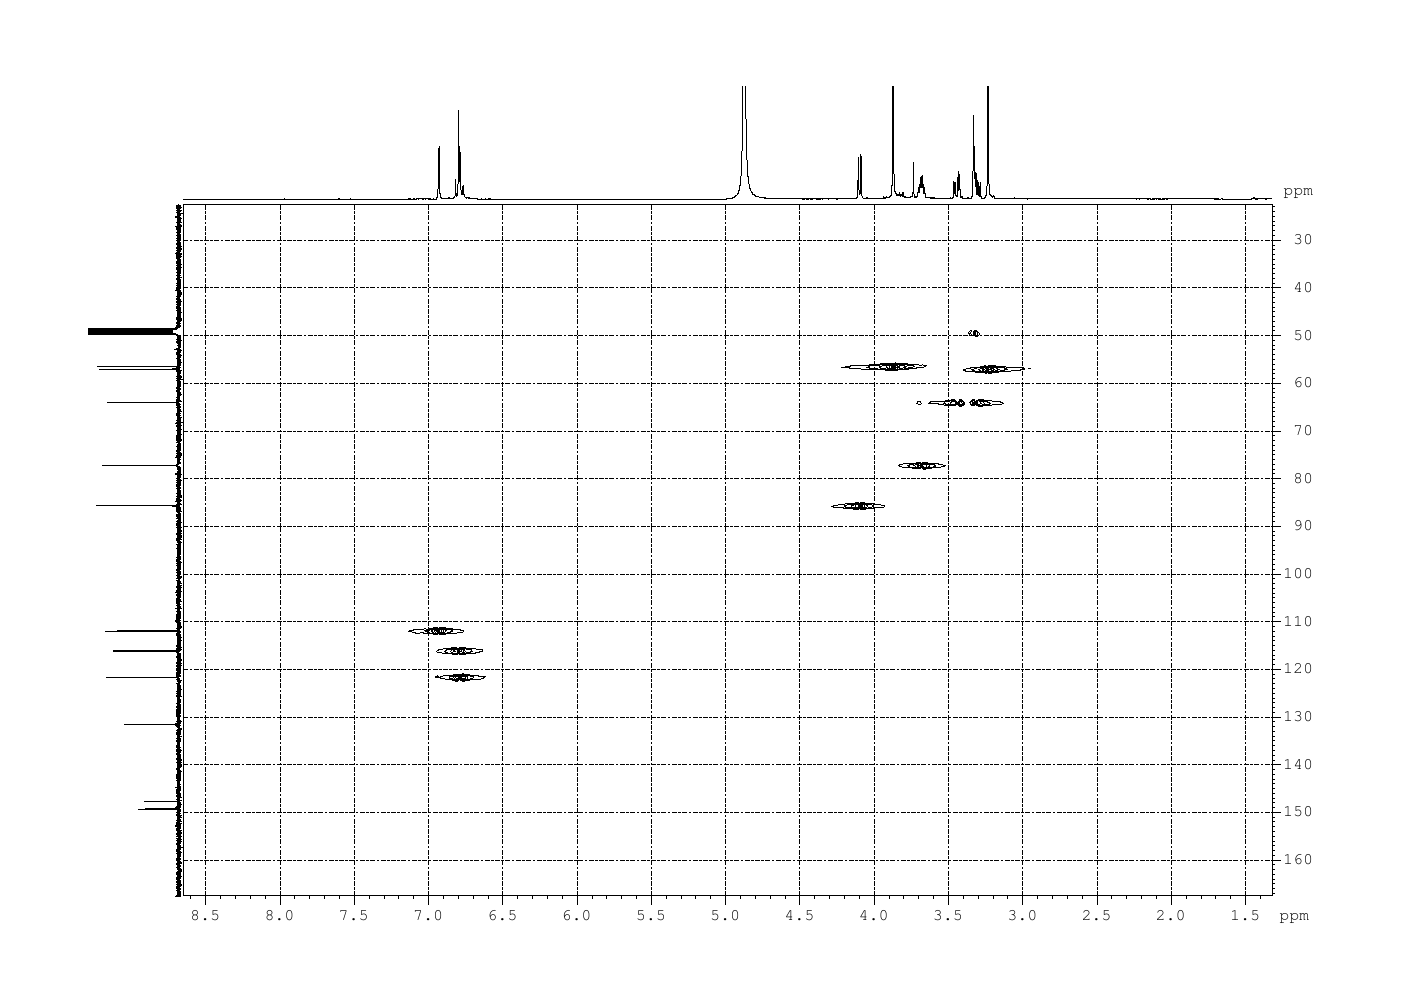
**

**S8** HMBC Spectrum of **1** in CD3OD


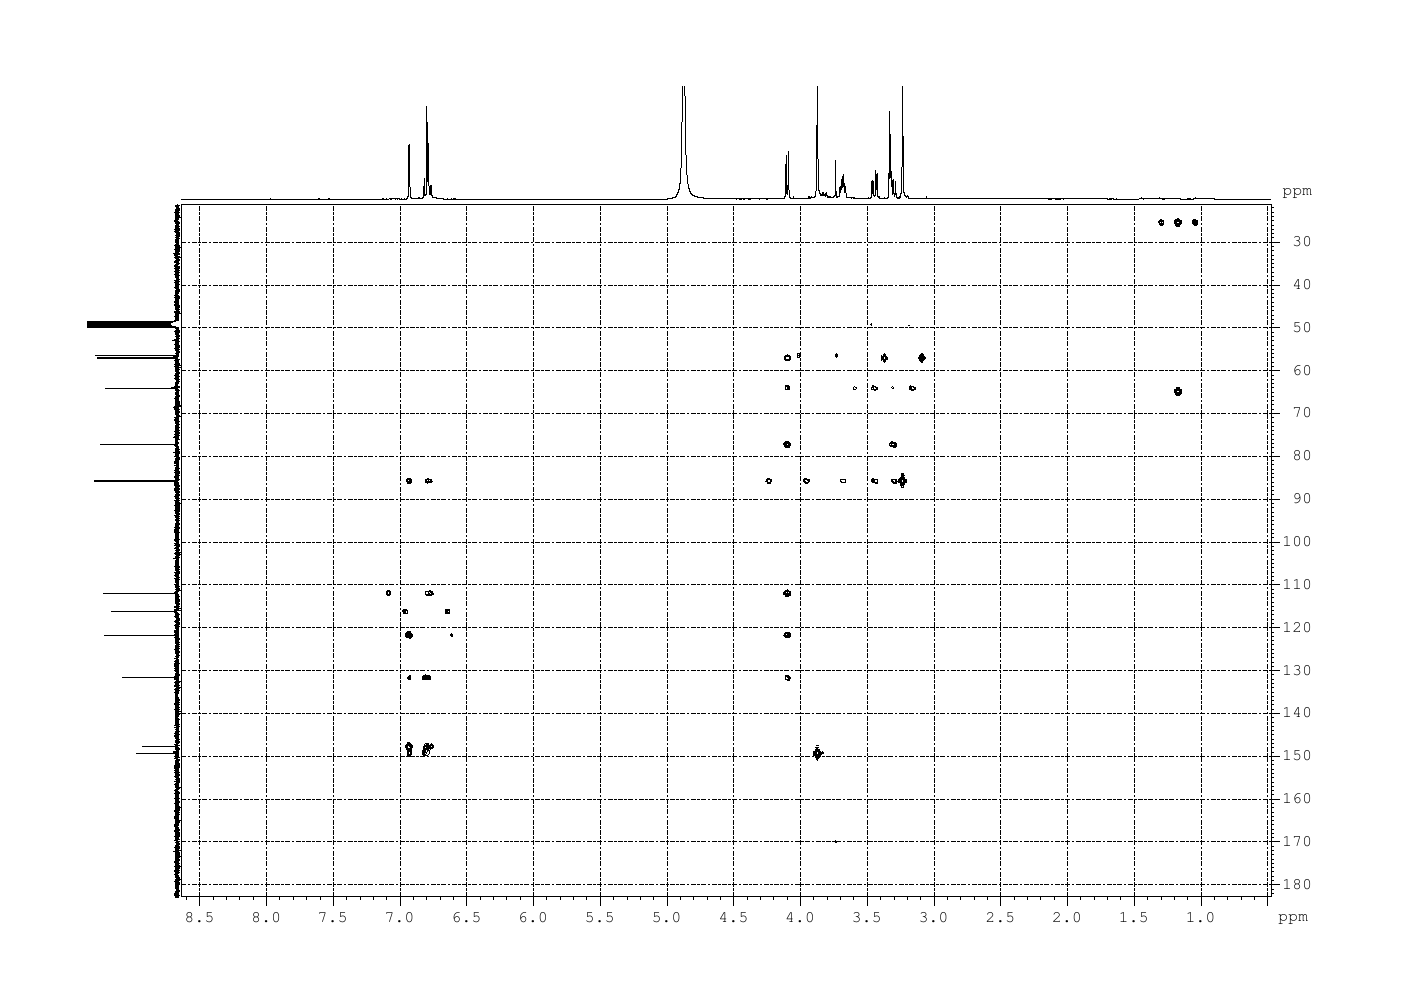


**S9** ICD data of **1a**

**
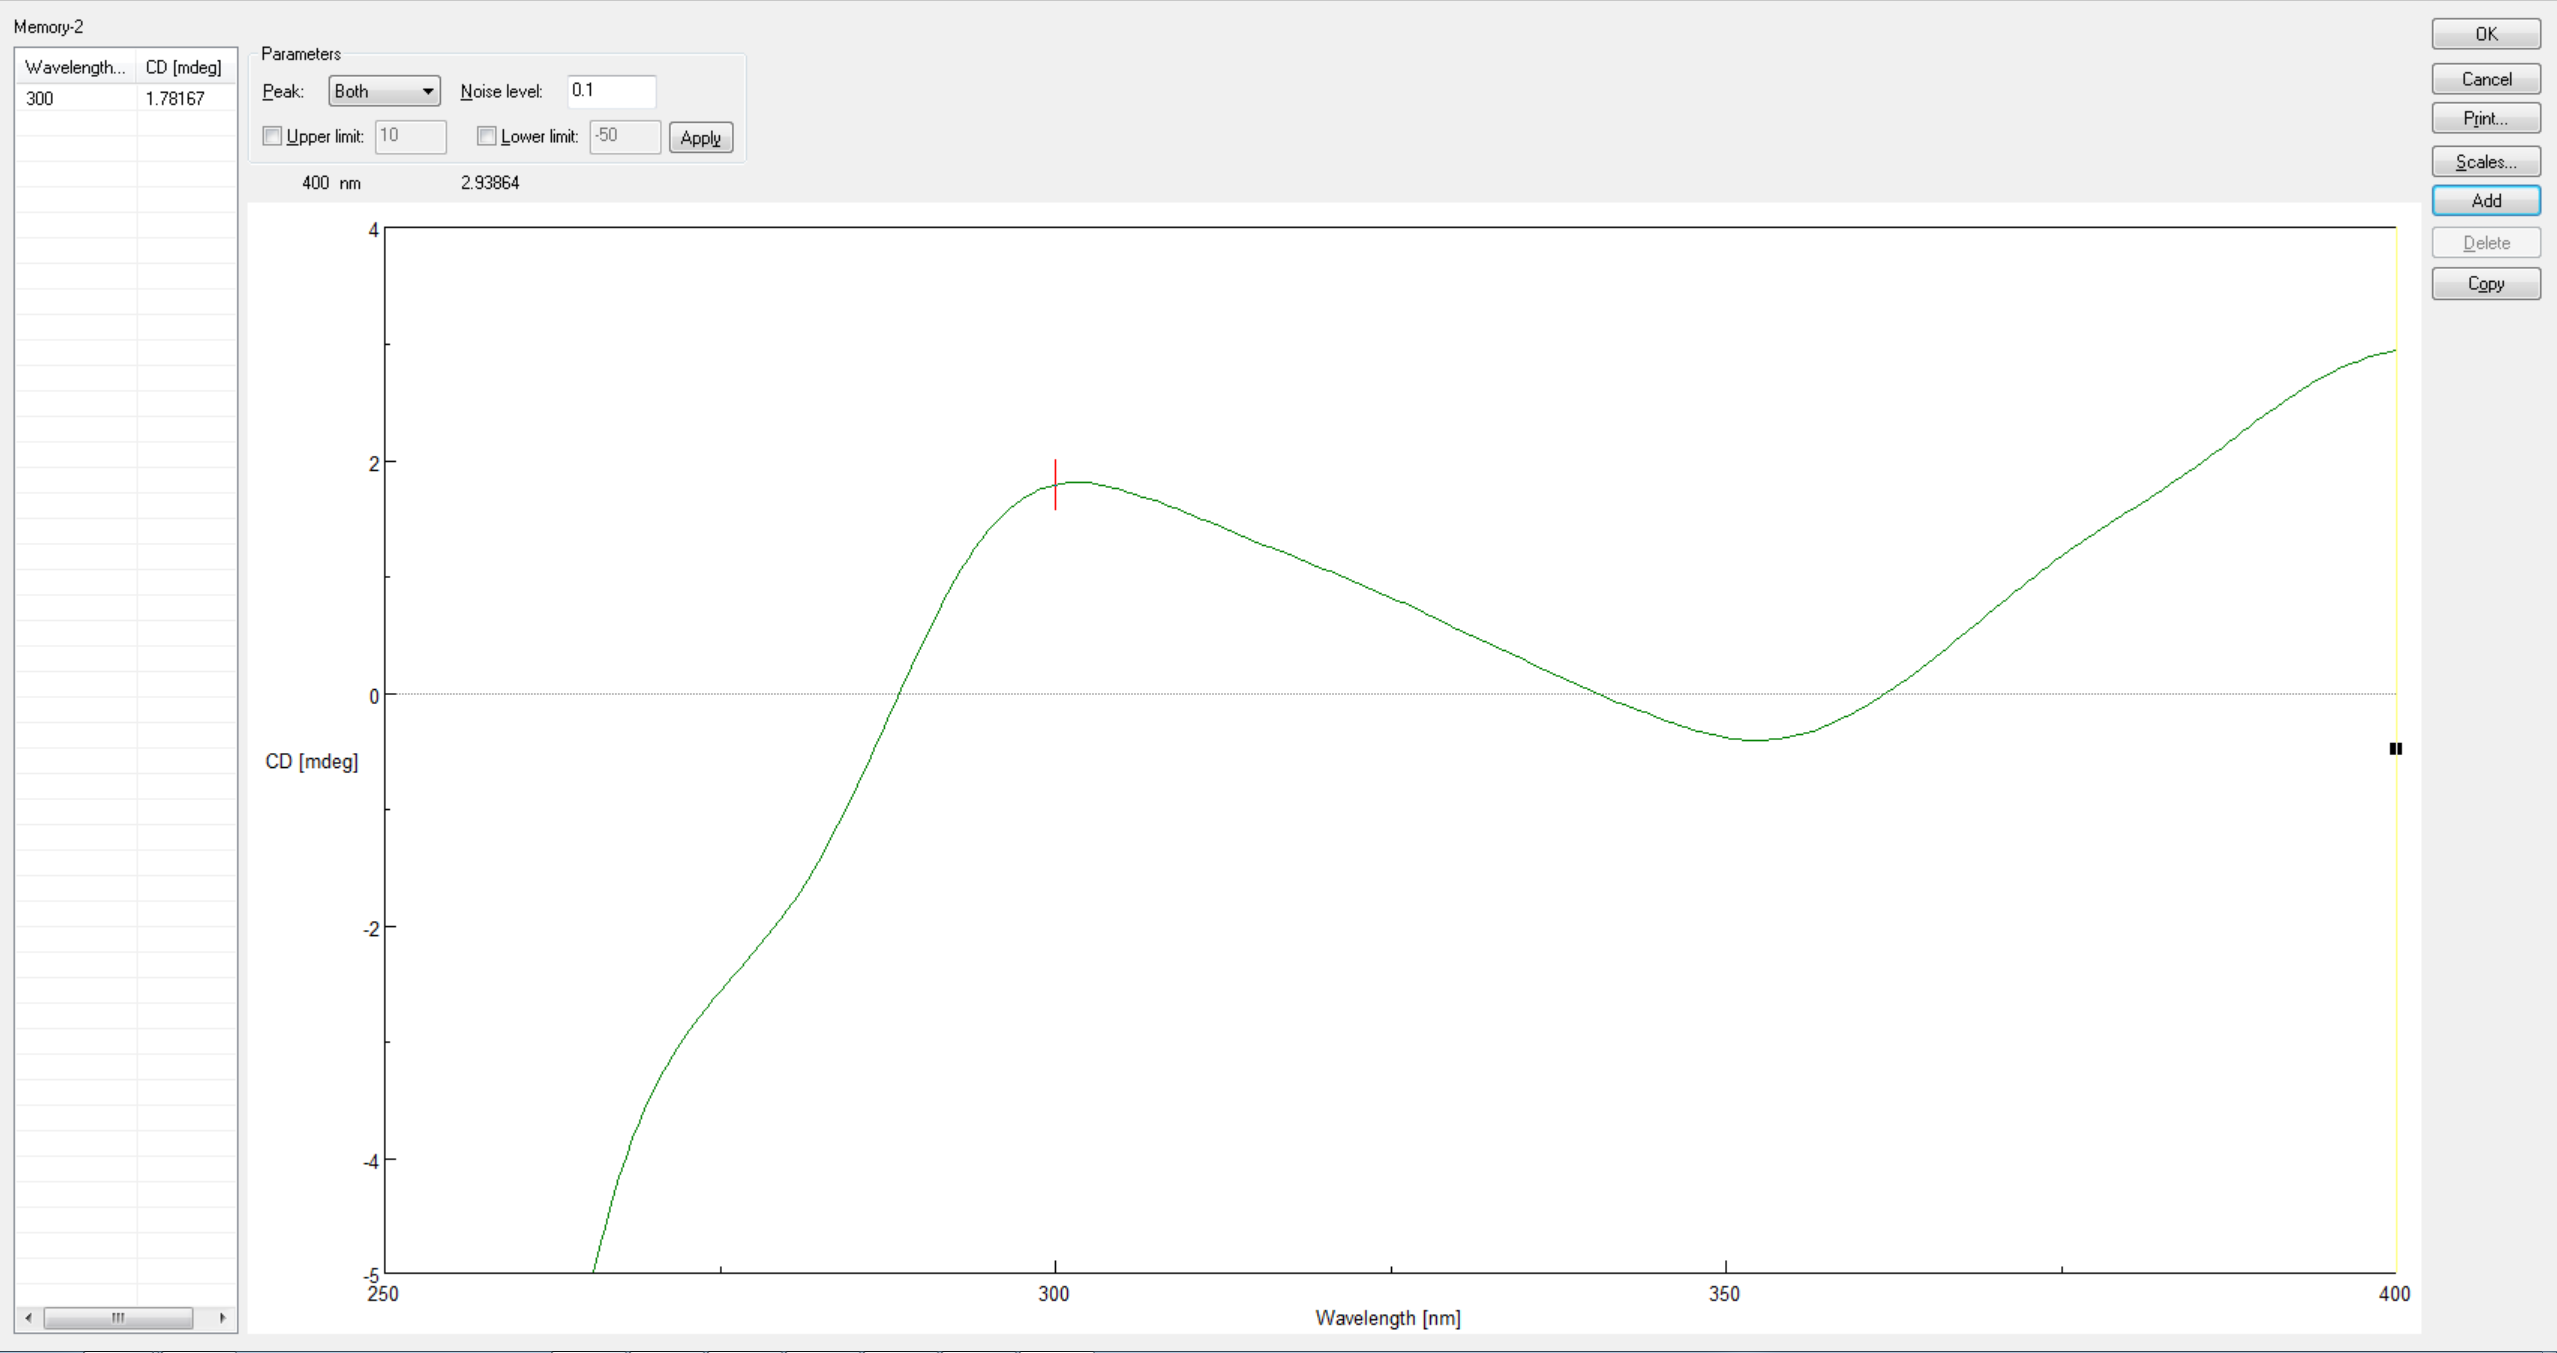
**

**S10** ICD data of **1b**

**
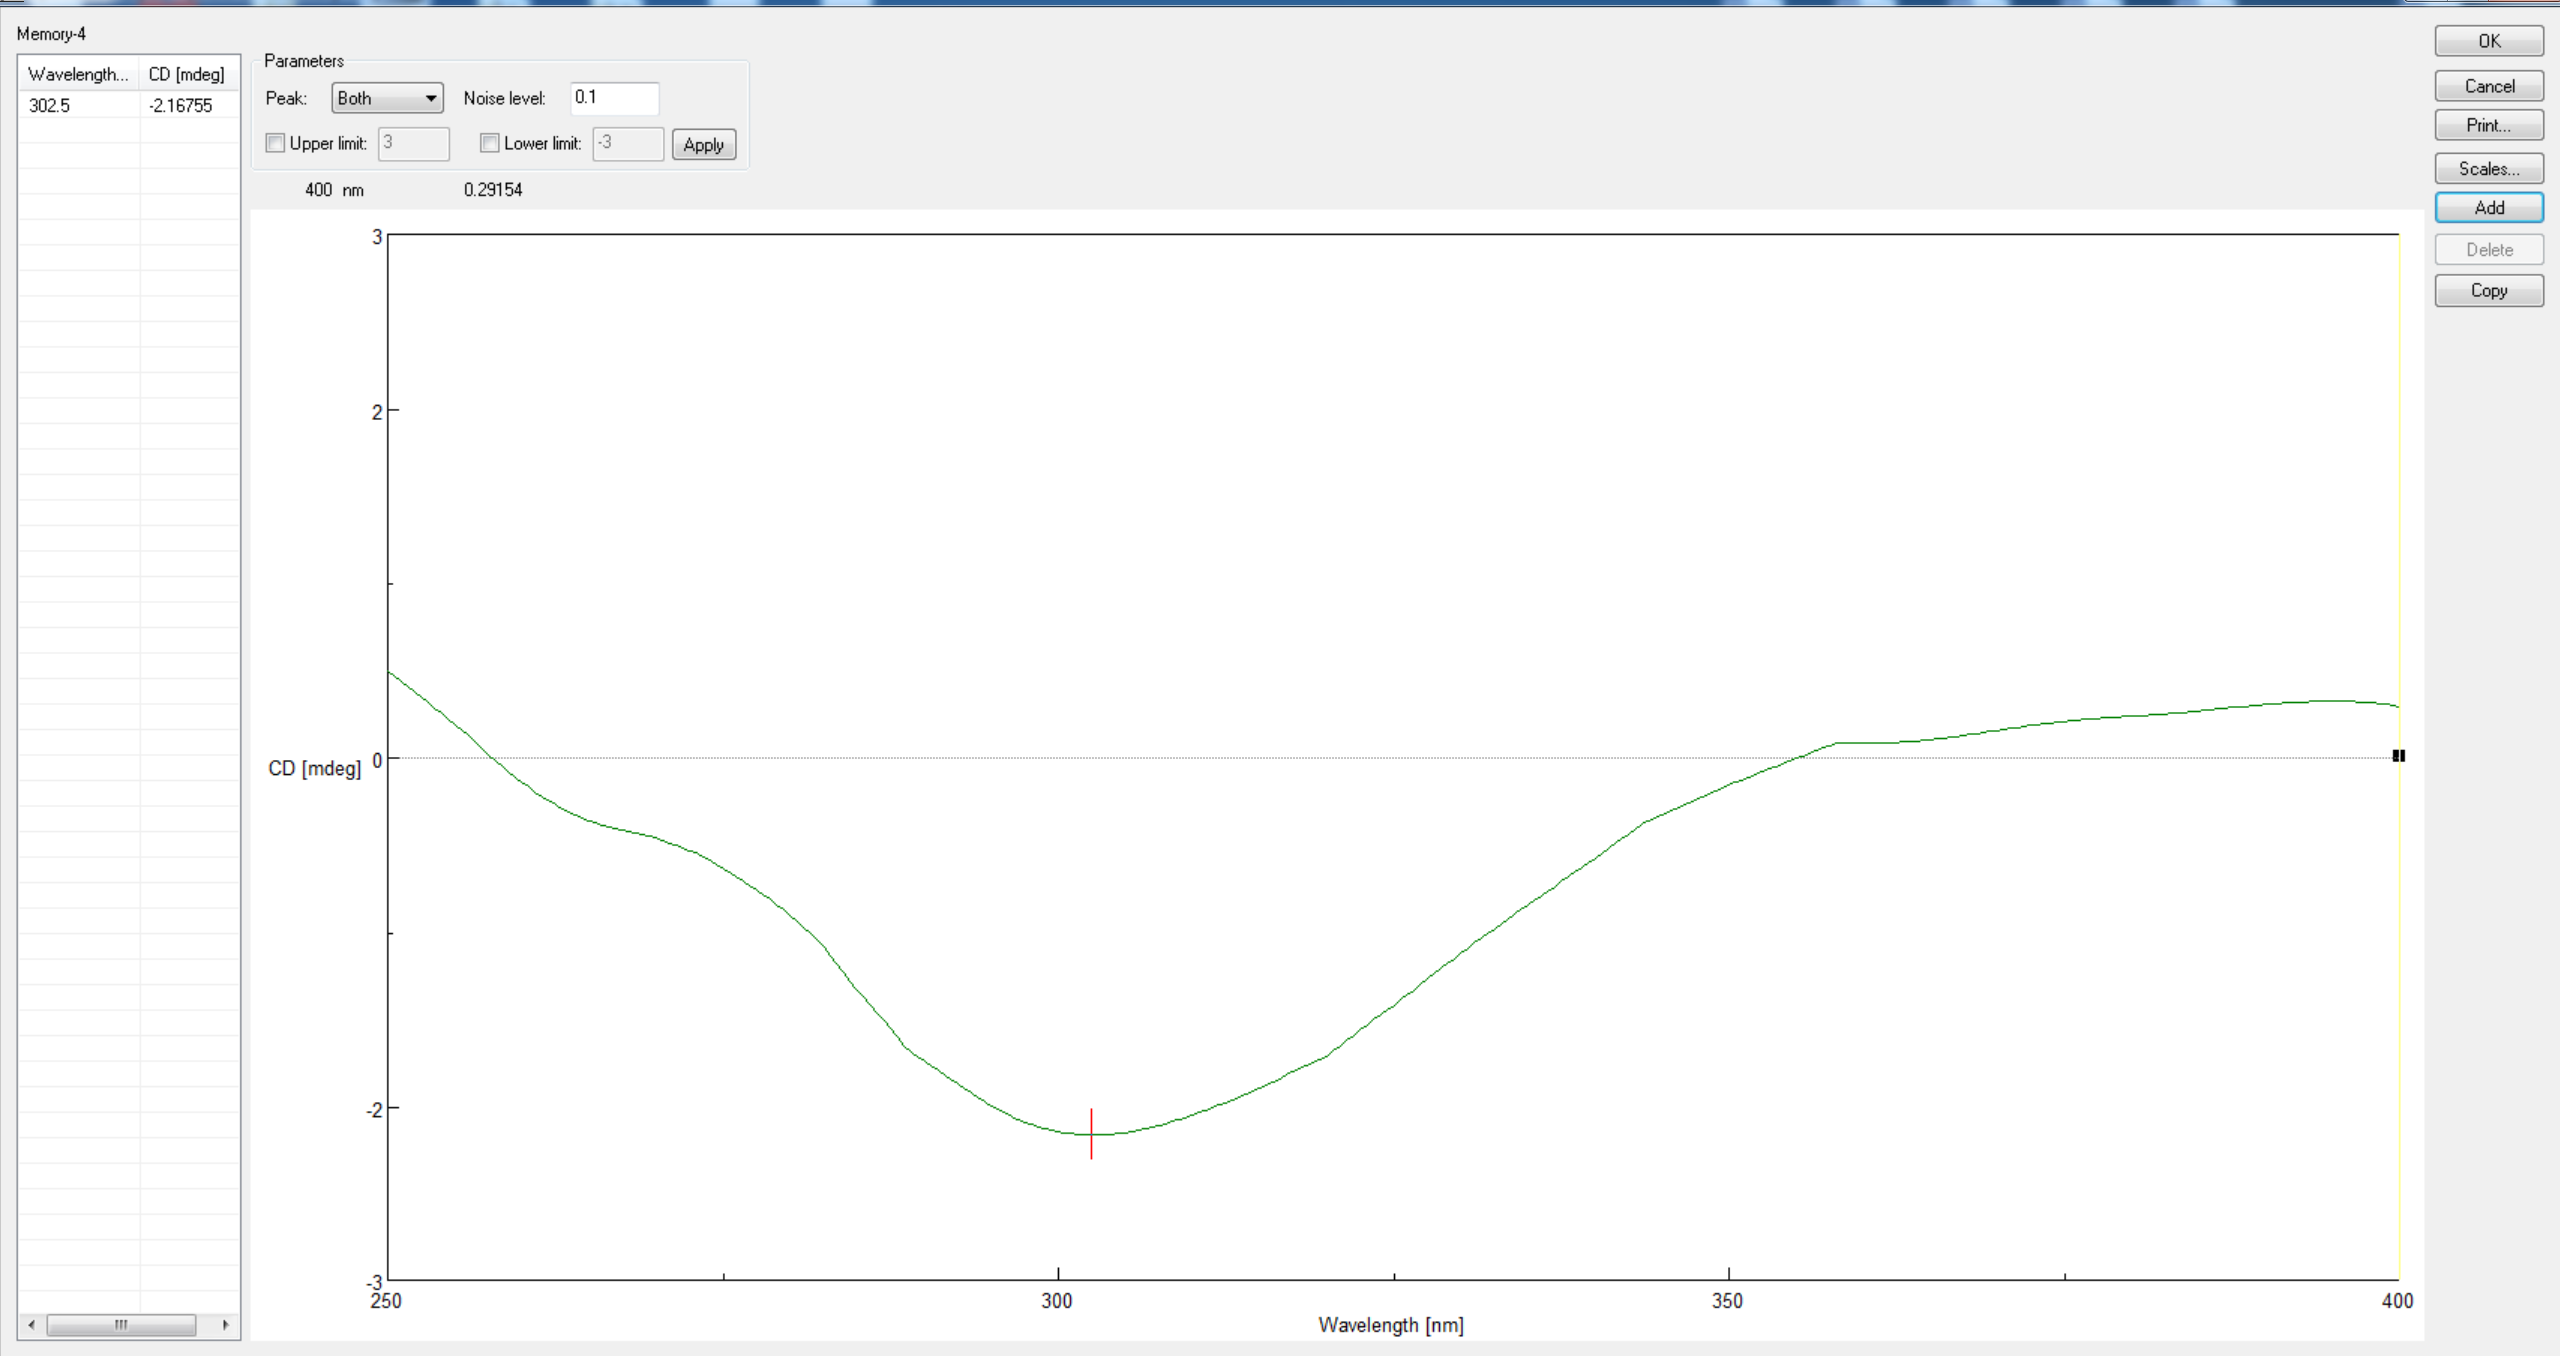
**

**S11** HR-ESIMS of **2**

**
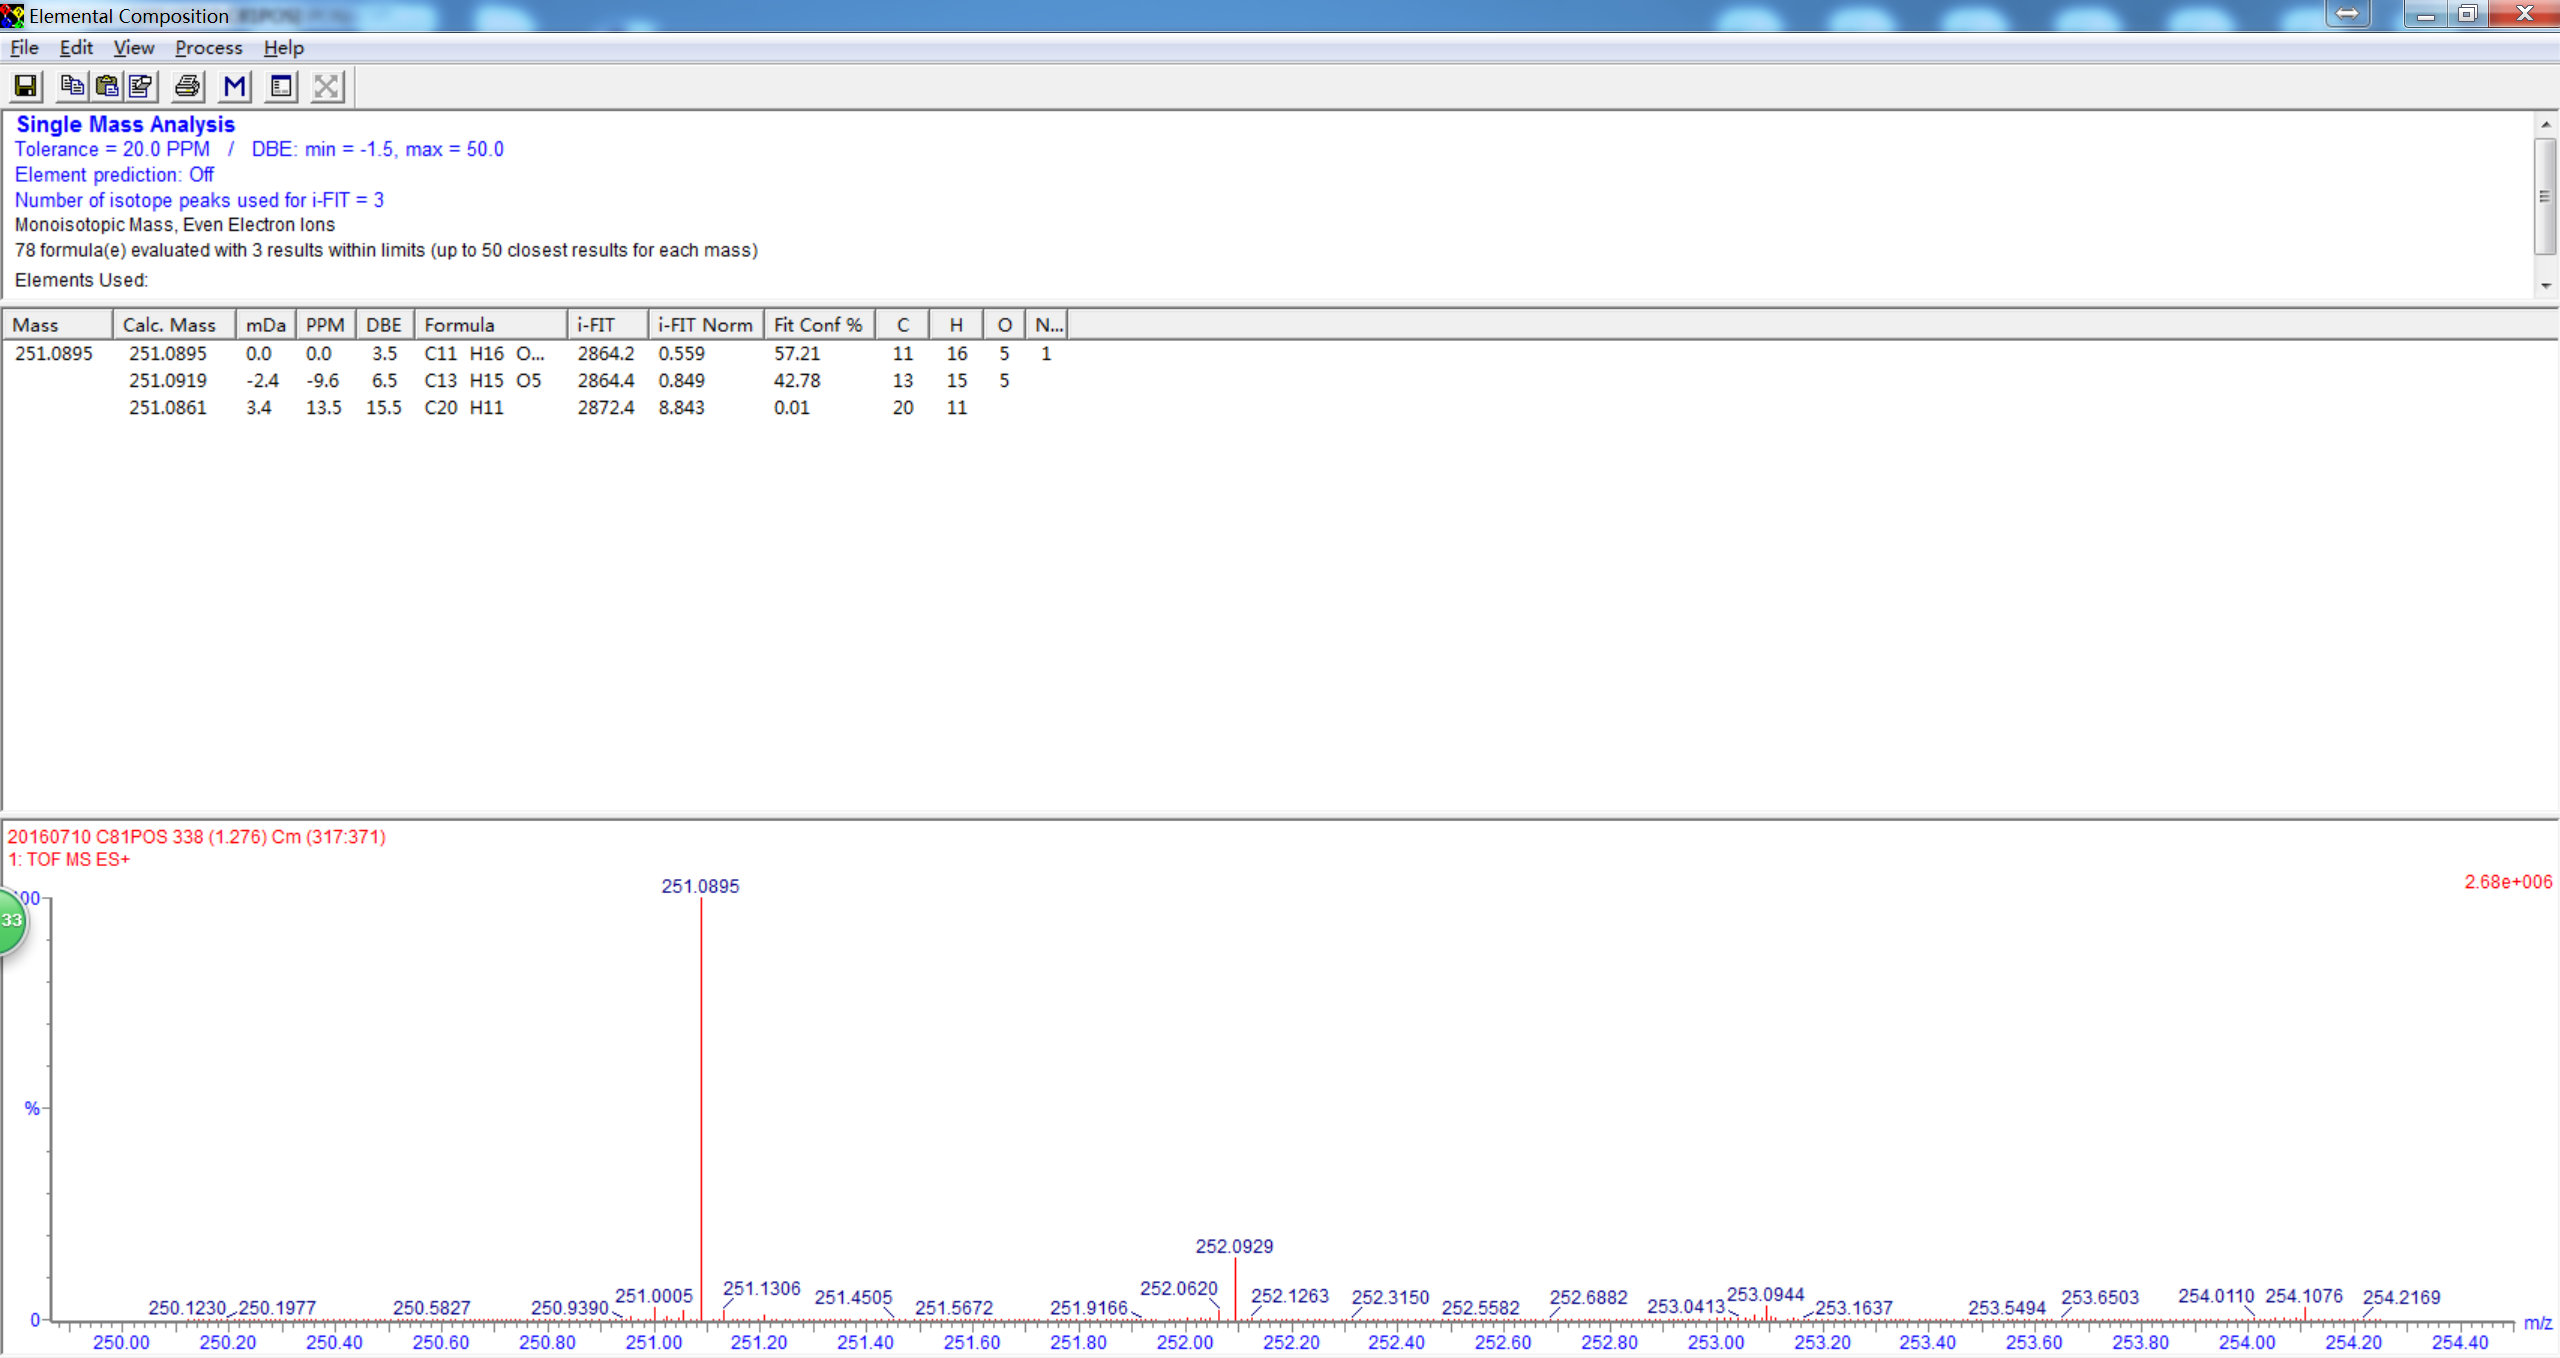
**

**S12** UV of **2**

**
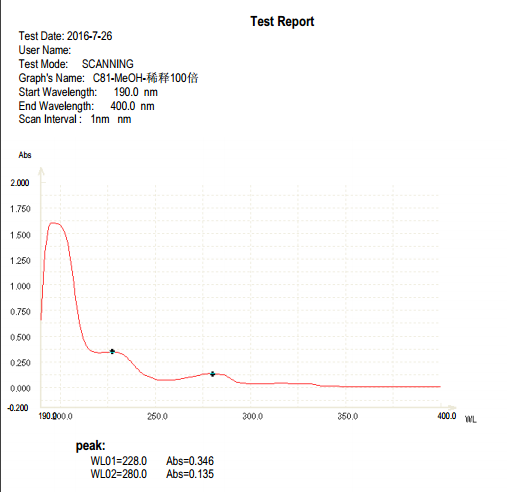
**

**S13** IR of **2**

**
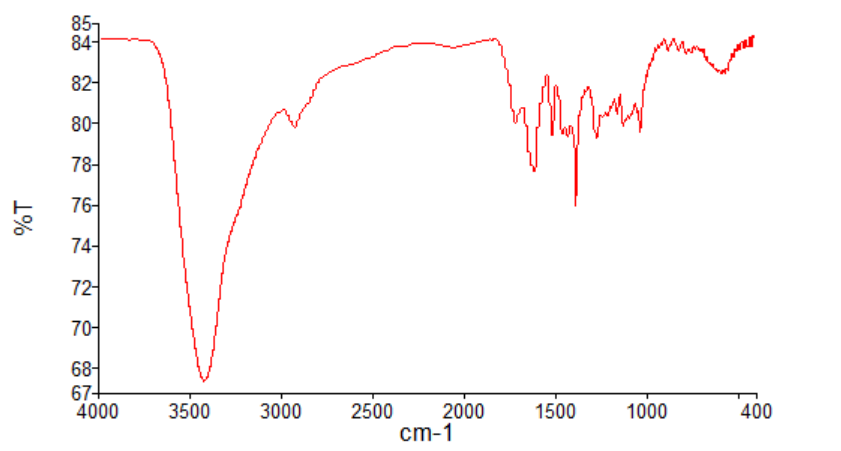
**

**S14** 1H NMR Spectrum of **2** in CD3OD


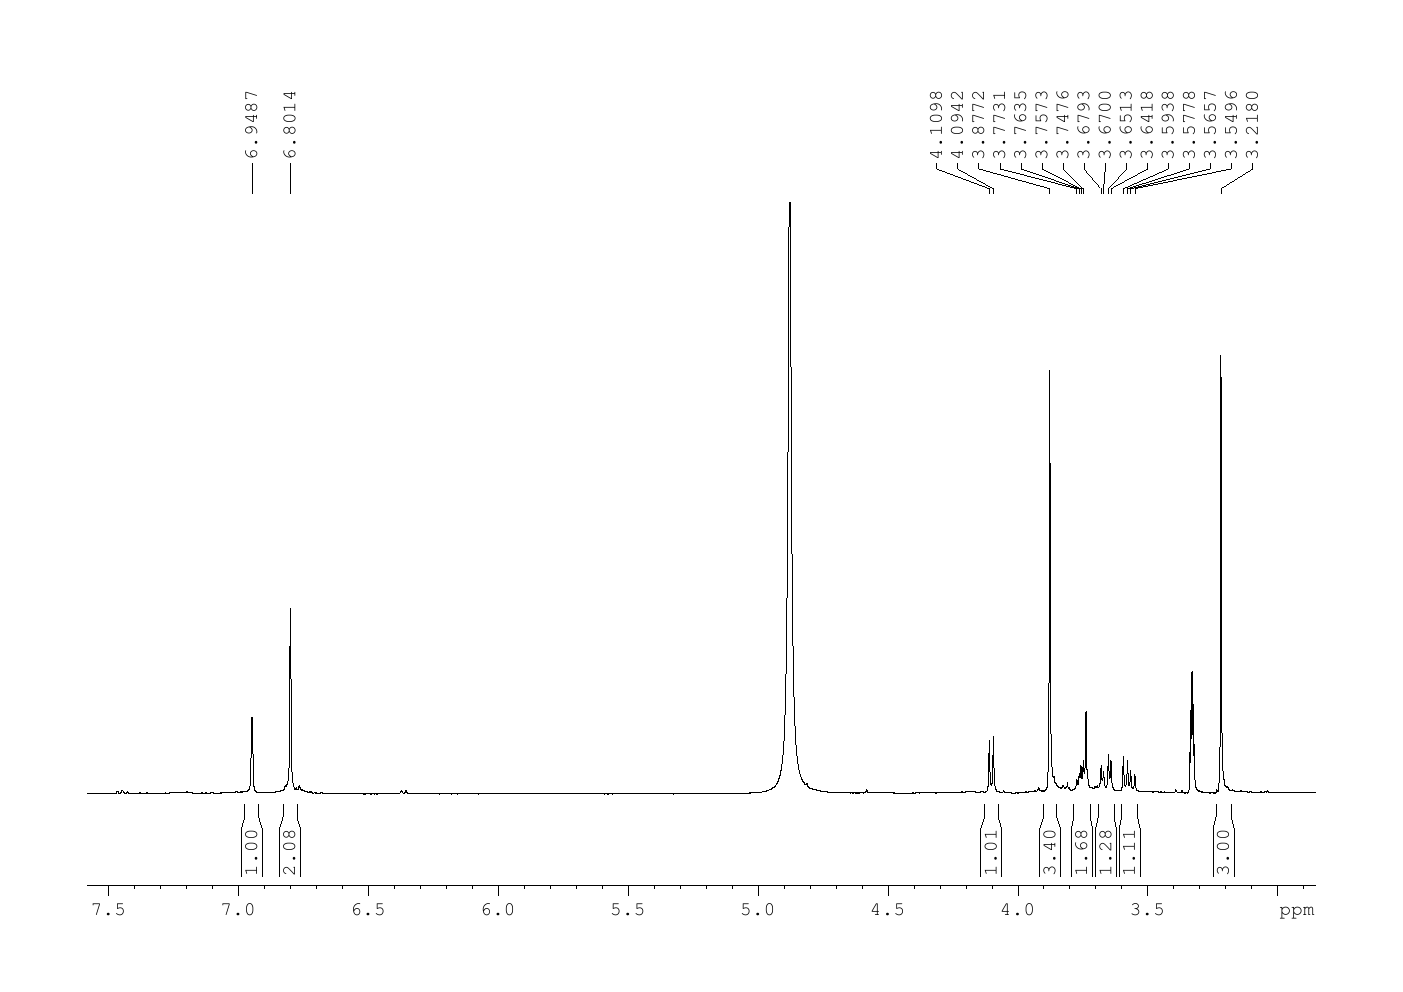


**S15** 13C NMR Spectrum of **2** in CD3OD


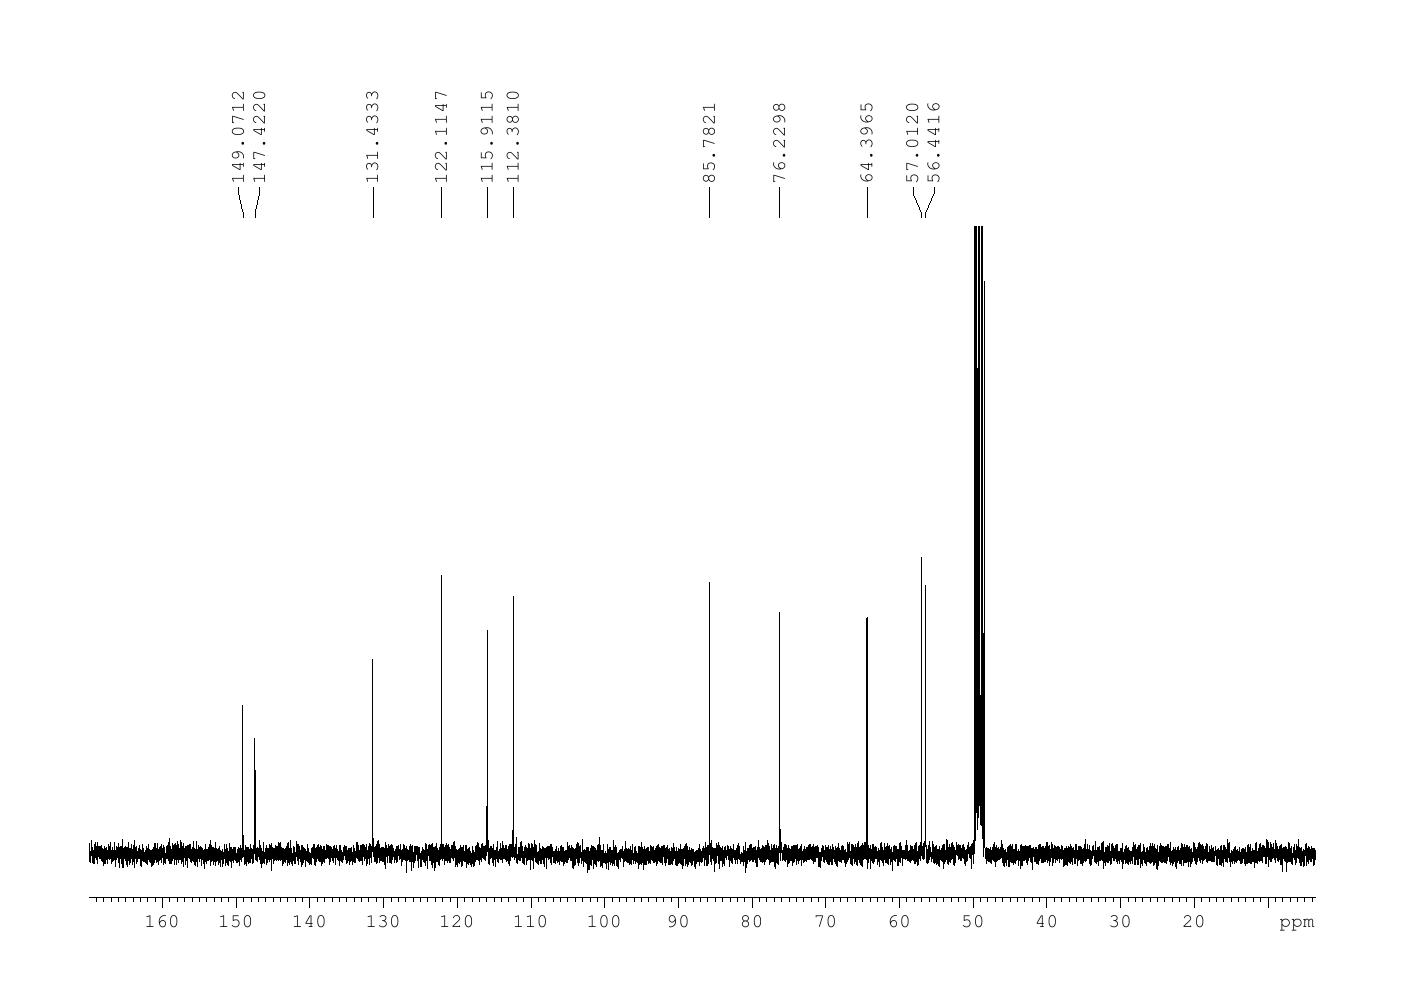


**S16** NOESY Spectrum of **2** in CD3OD


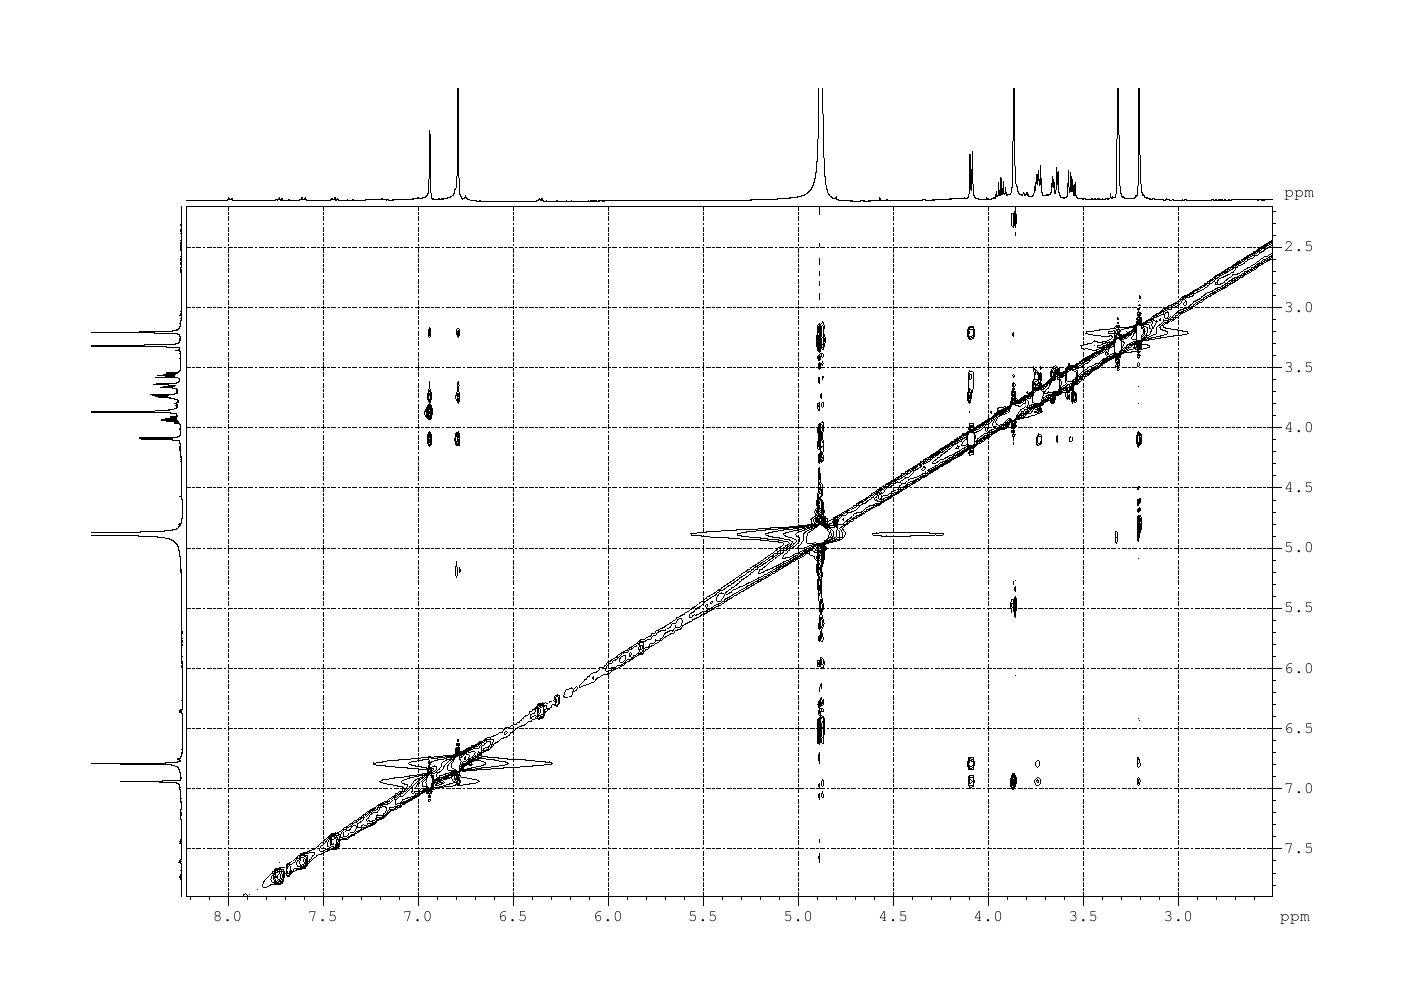


**S17** HSQC Spectrum of **2** in CD3OD


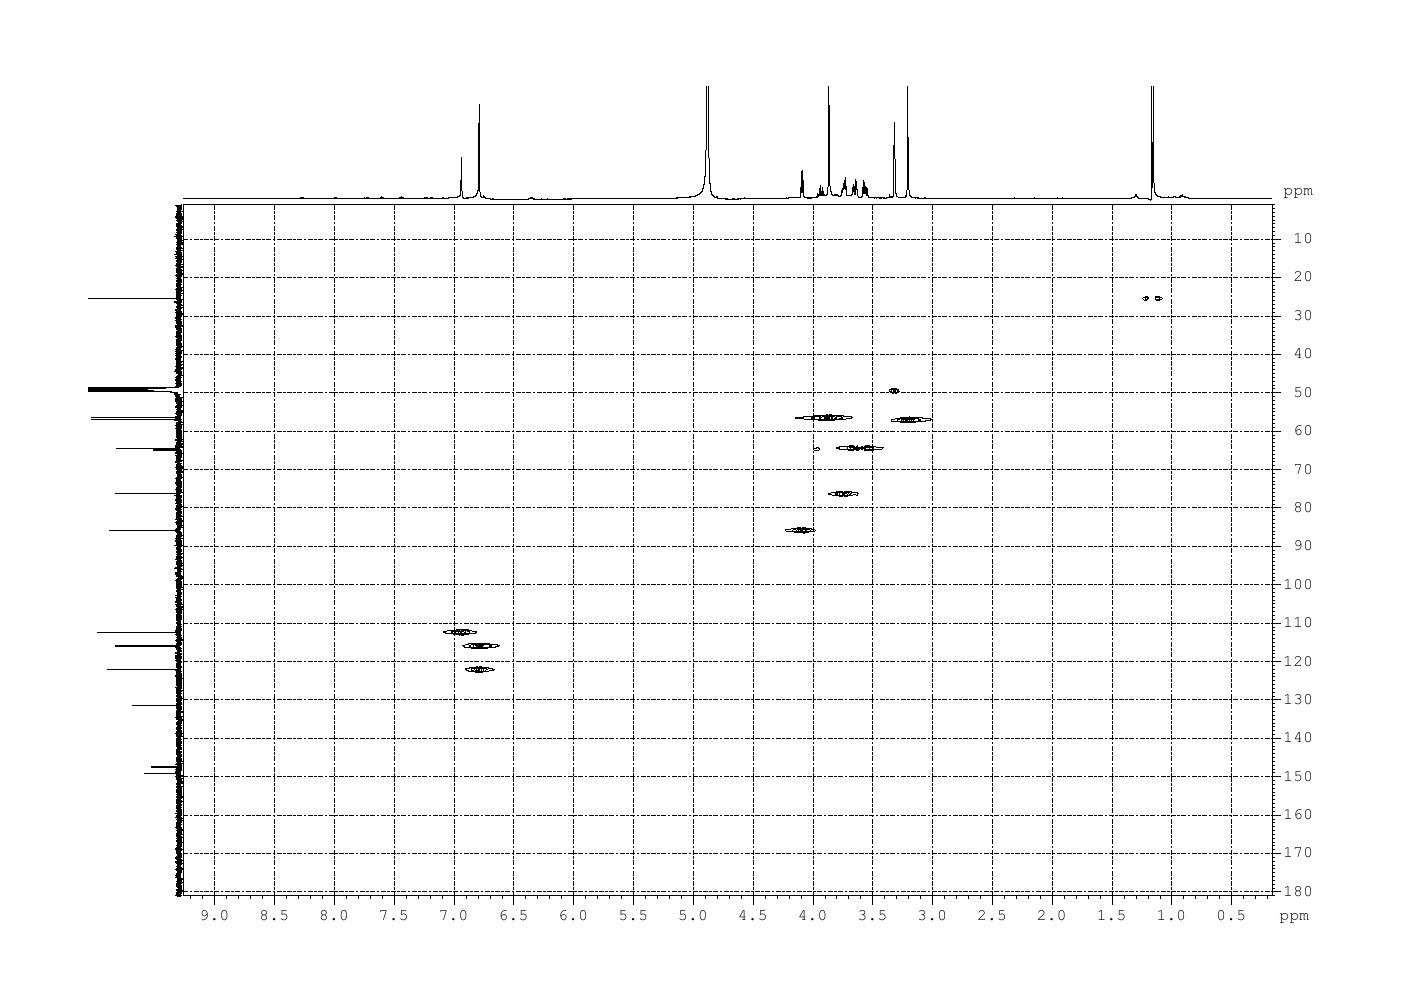


**S18** HMBC Spectrum of **2** in CD3OD


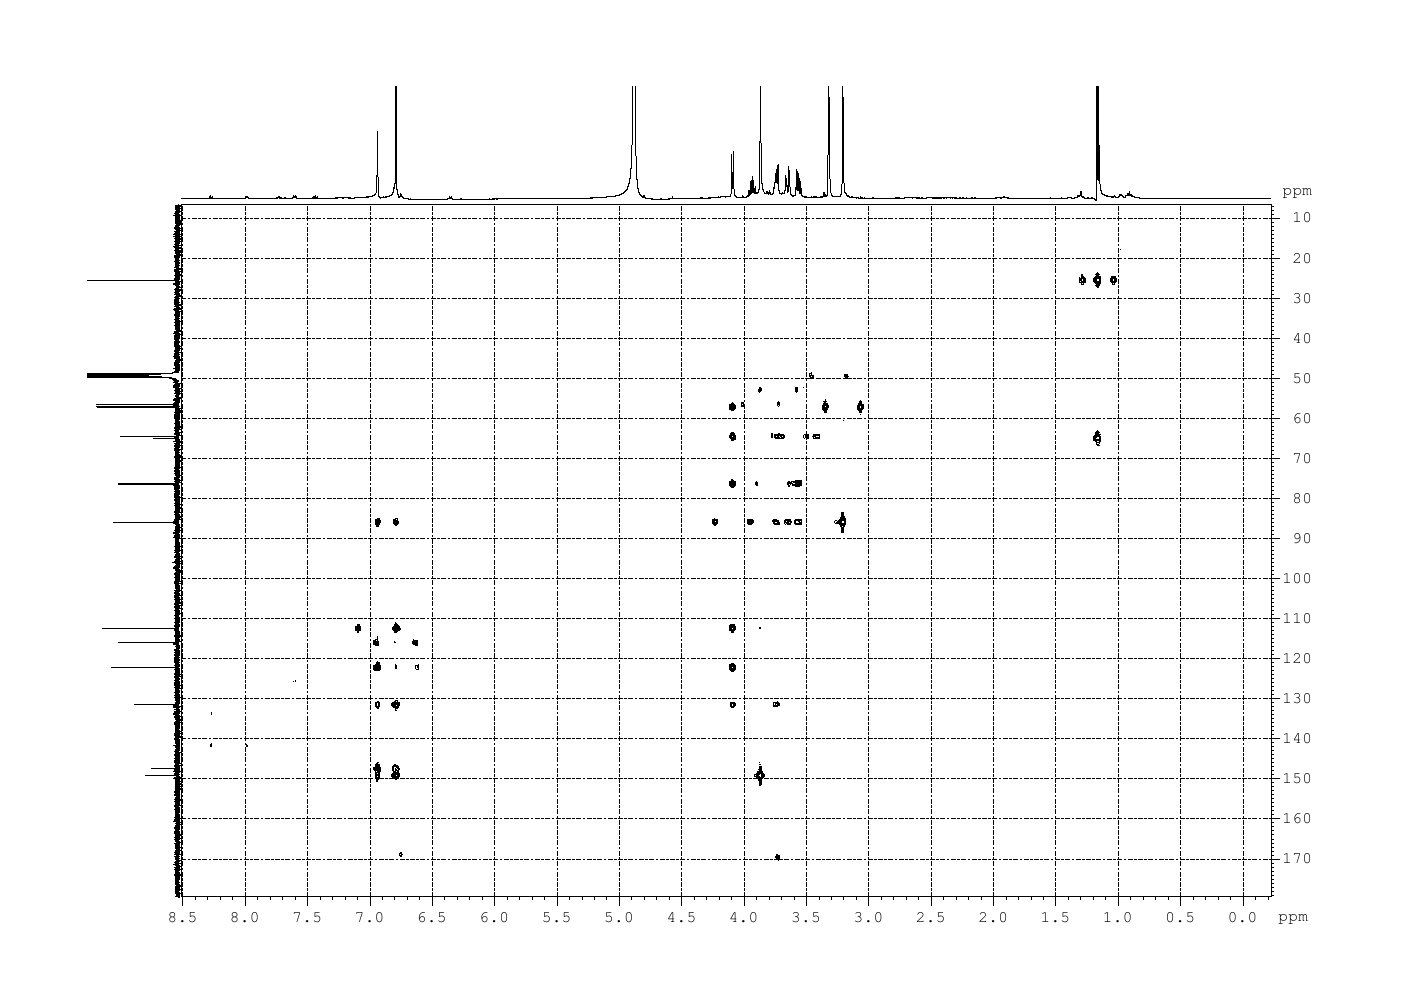


**S19** ICD data of **2a**

**
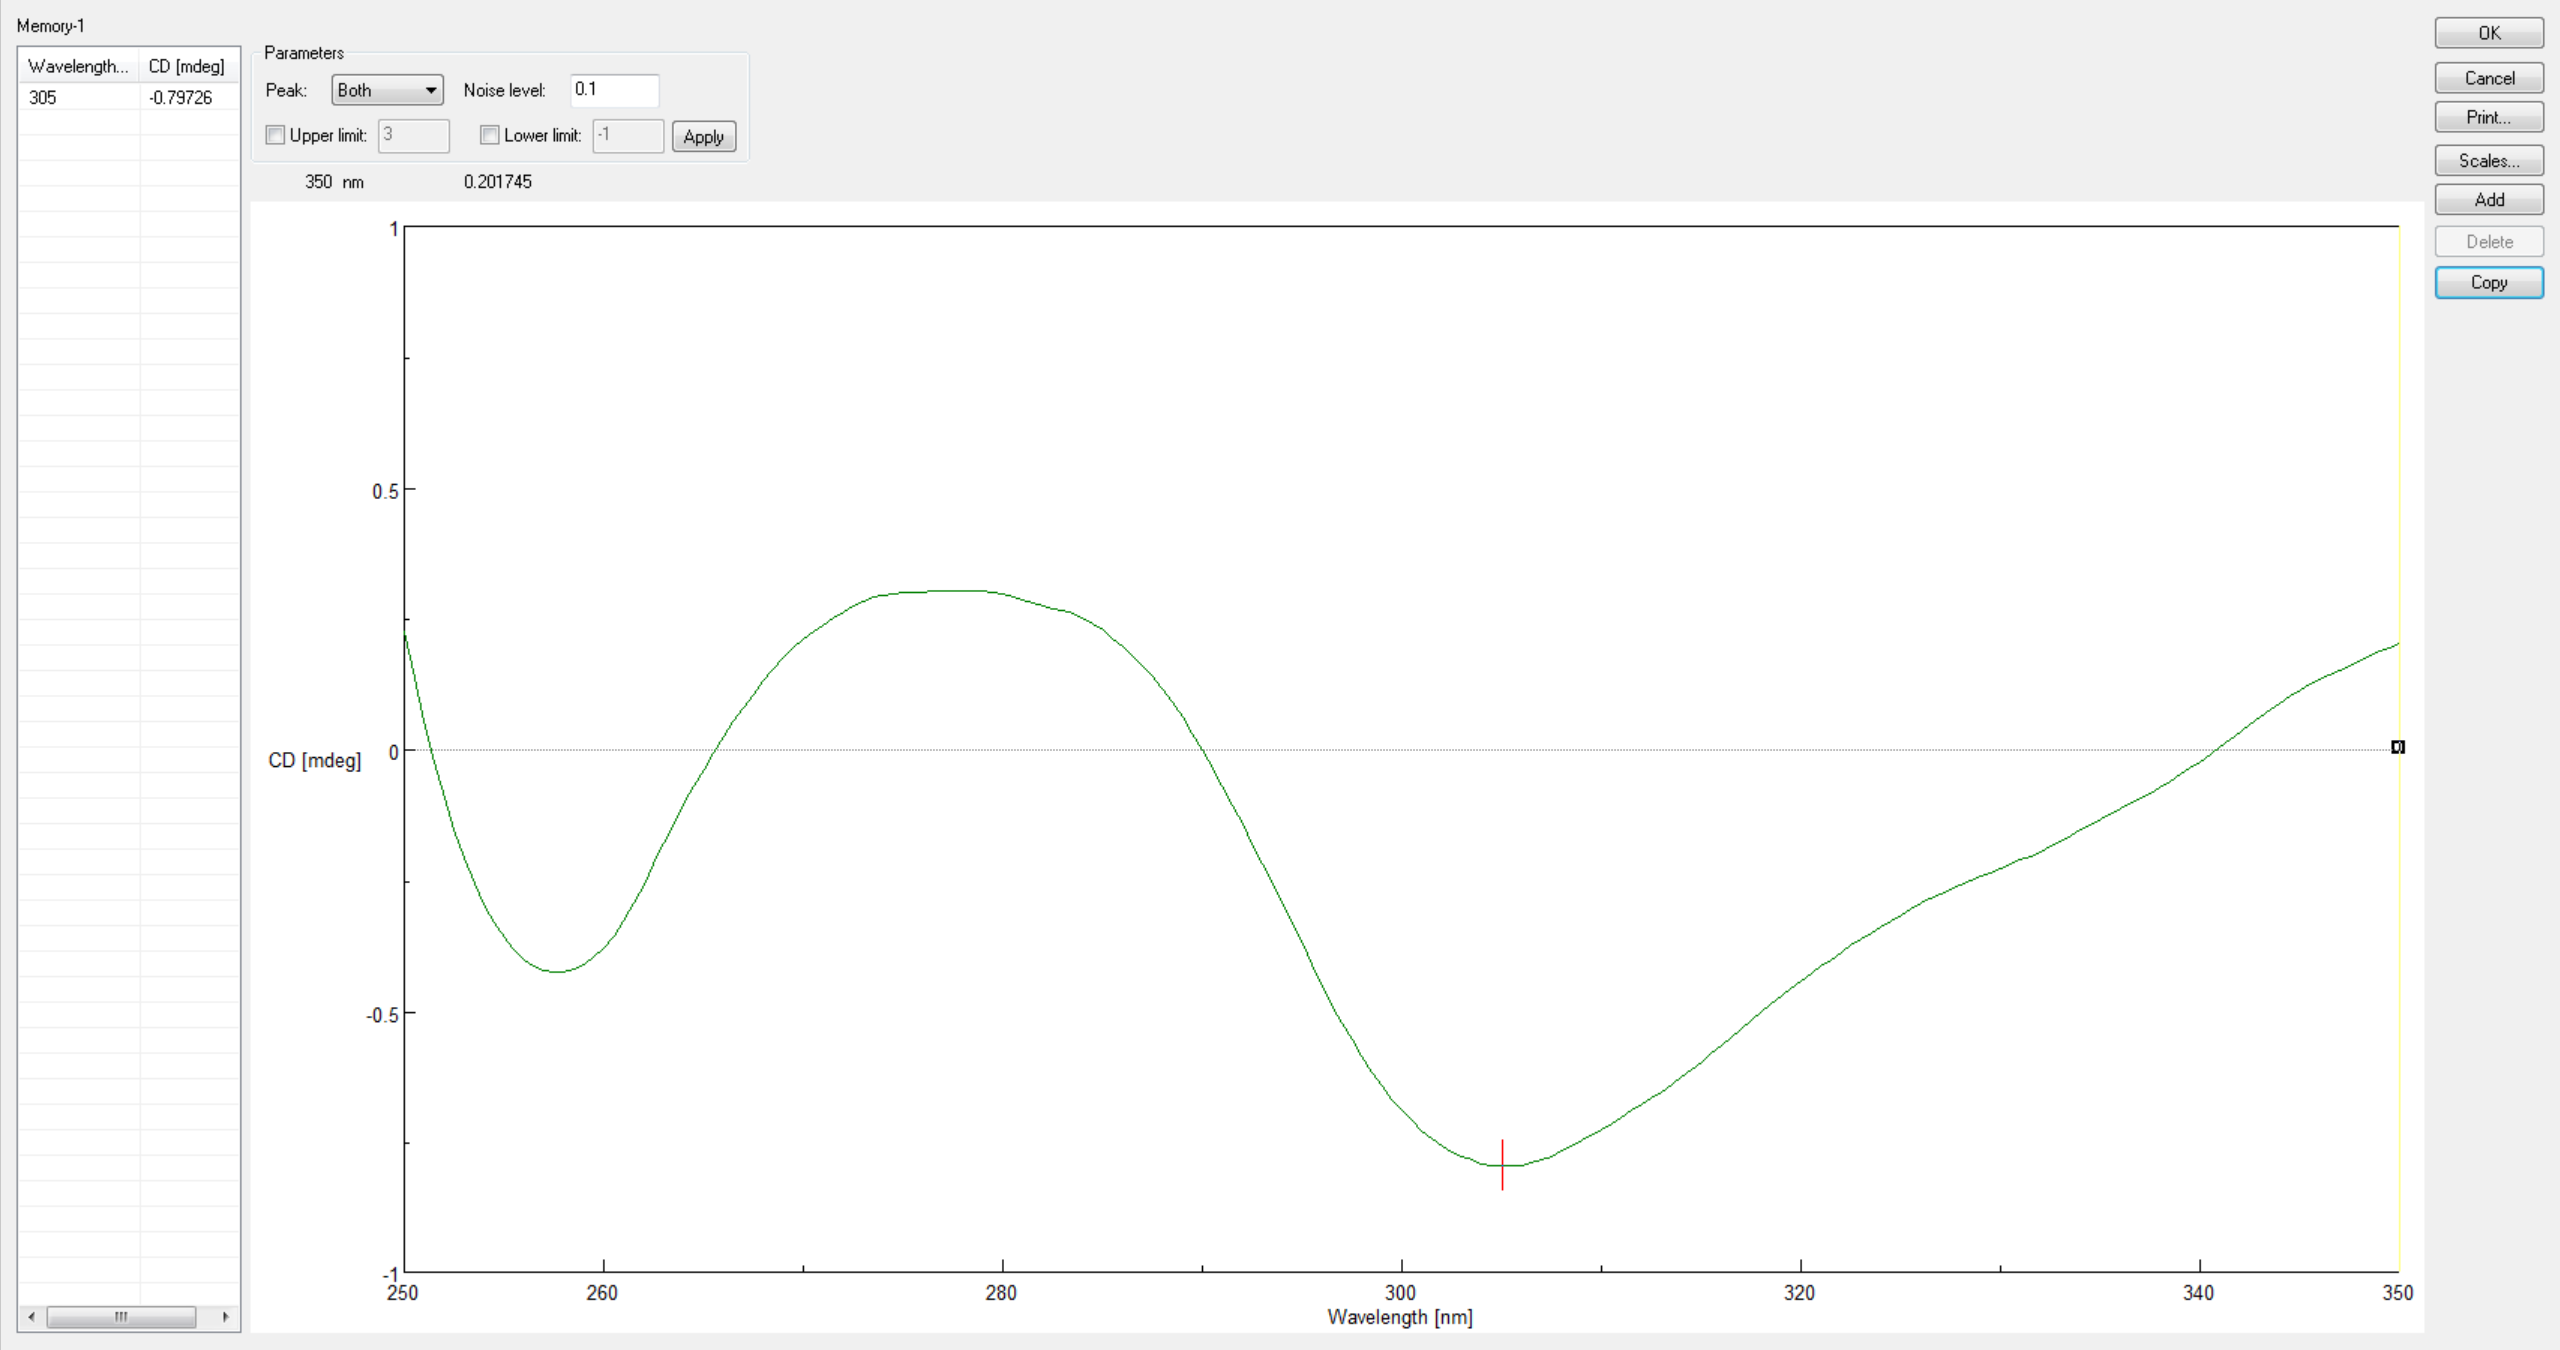
**

**S20** ICD data of **2b**


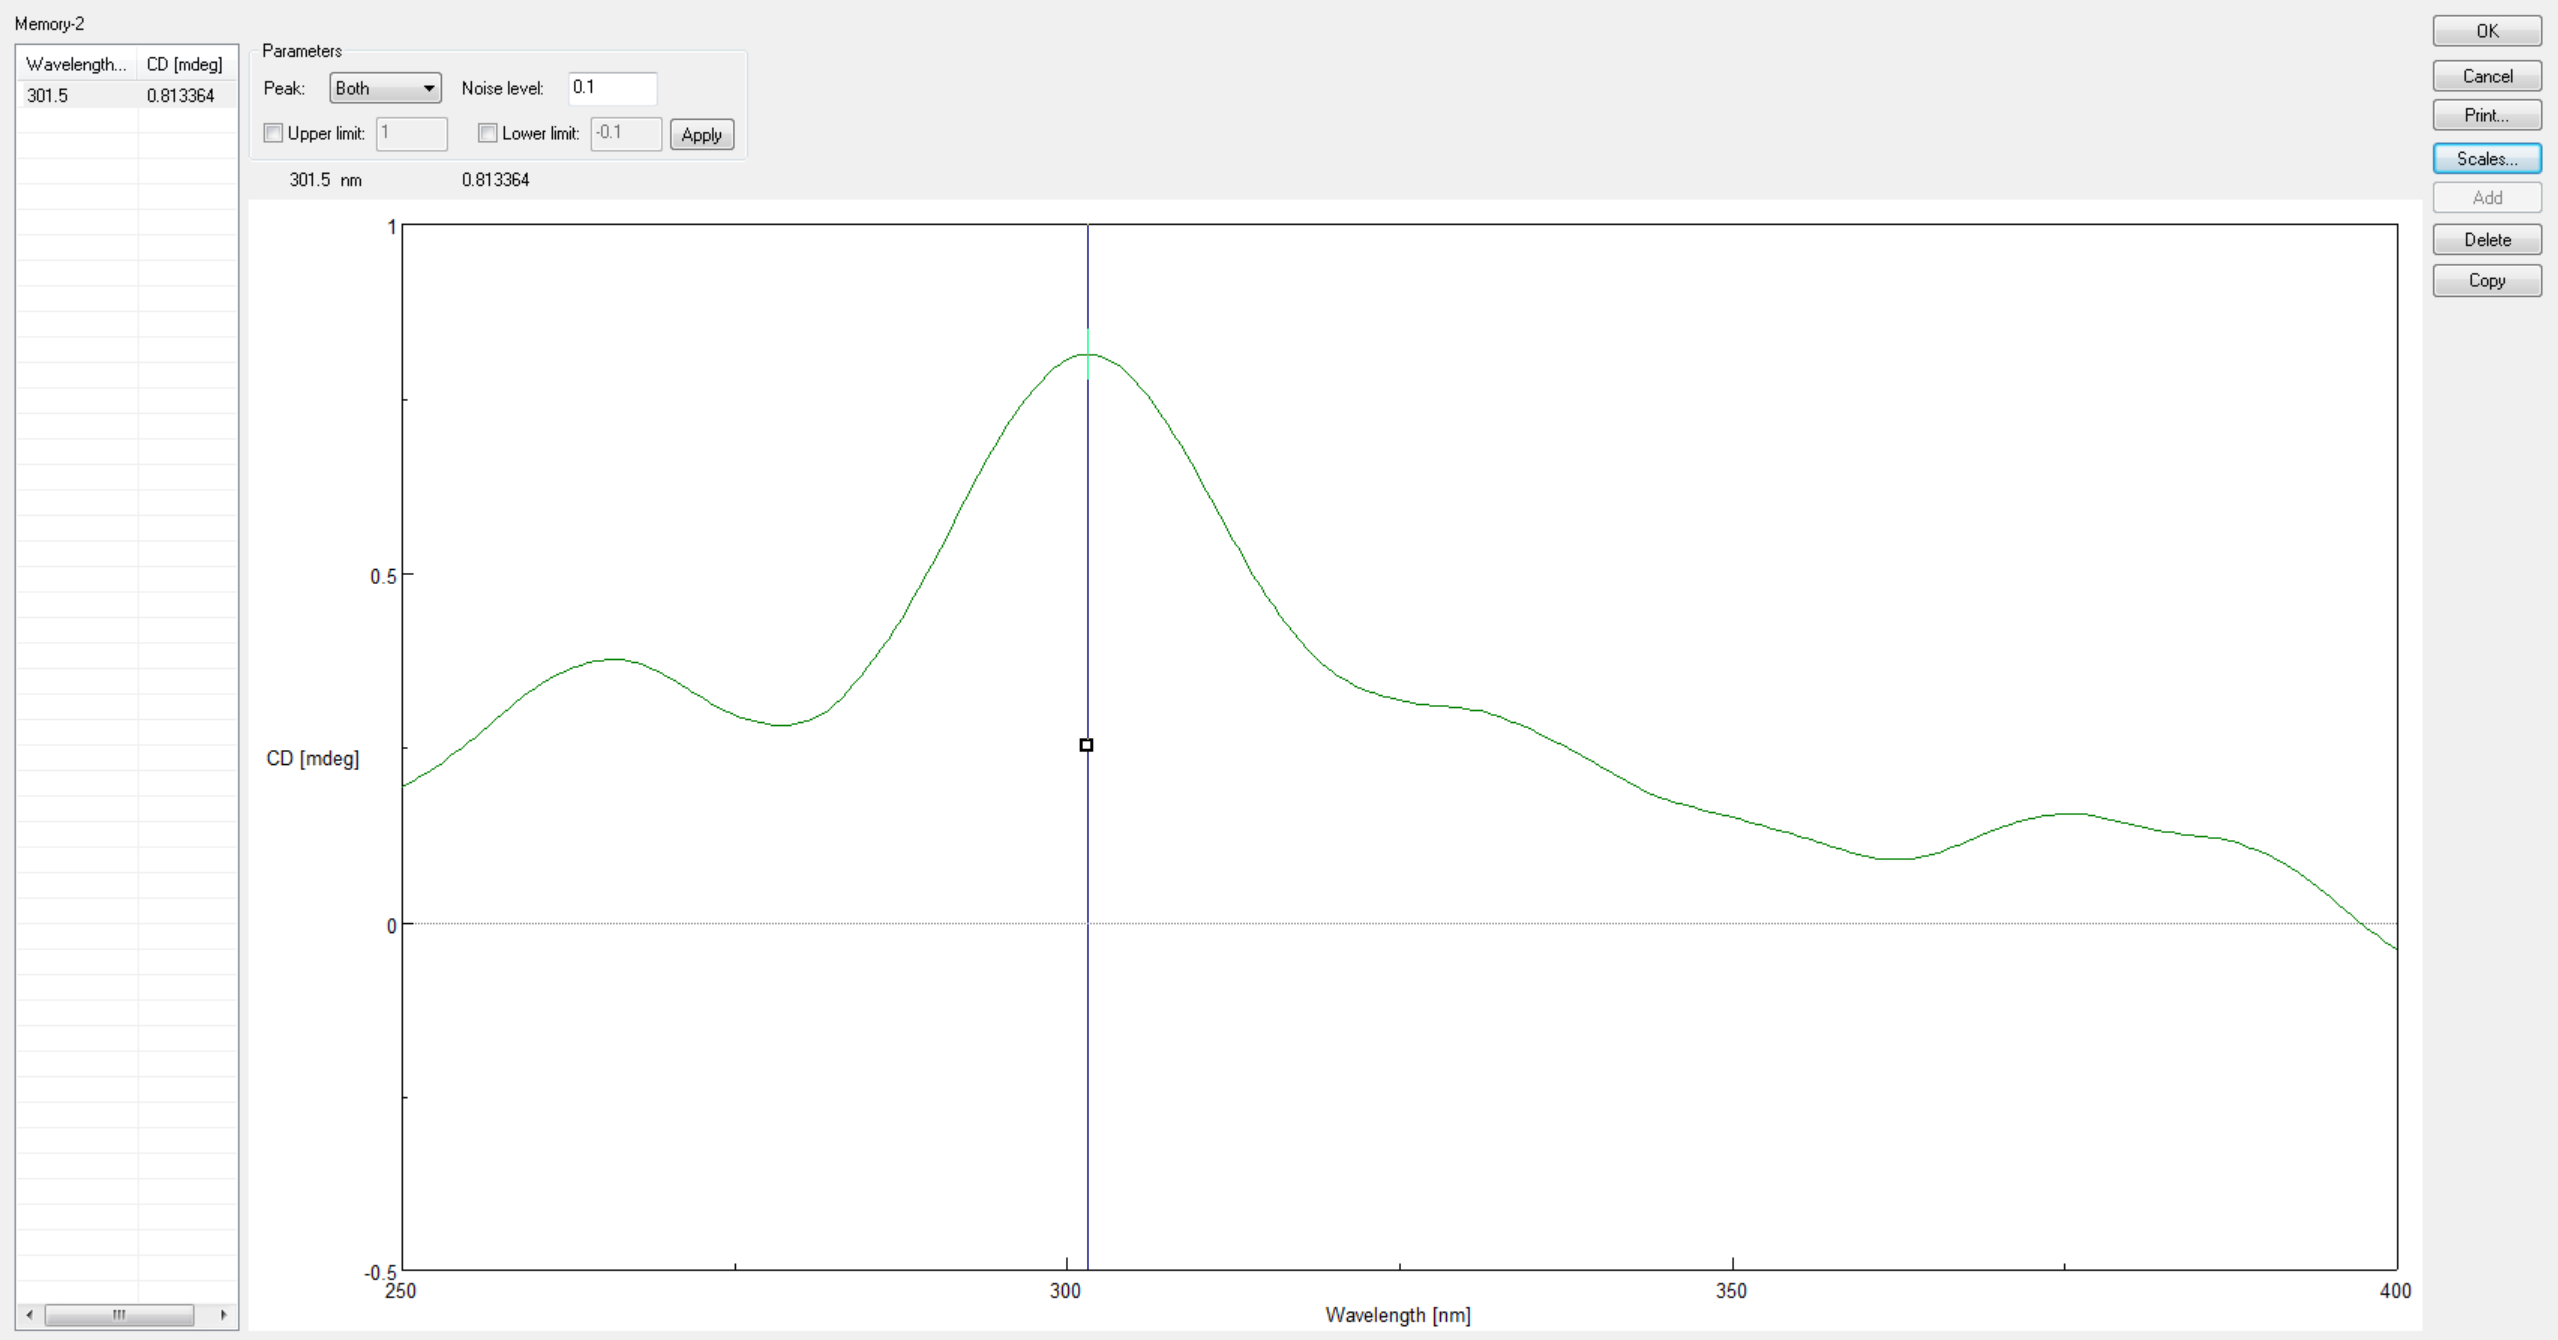


**S21** Chiral seperation of **1** (Hexane/Isopropanol, 80:20, 1mL/min)

**
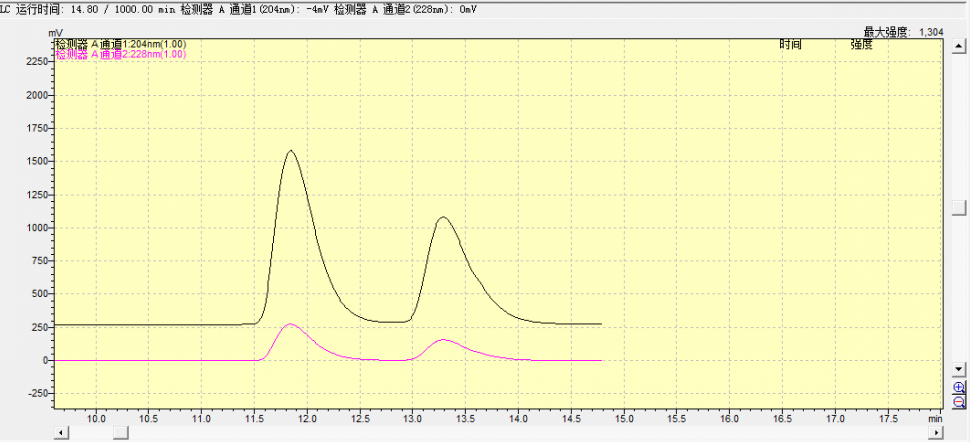
**

**S22** Chiral seperation of **2** (Hexane/Isopropanol, 80:20, 1mL/min)


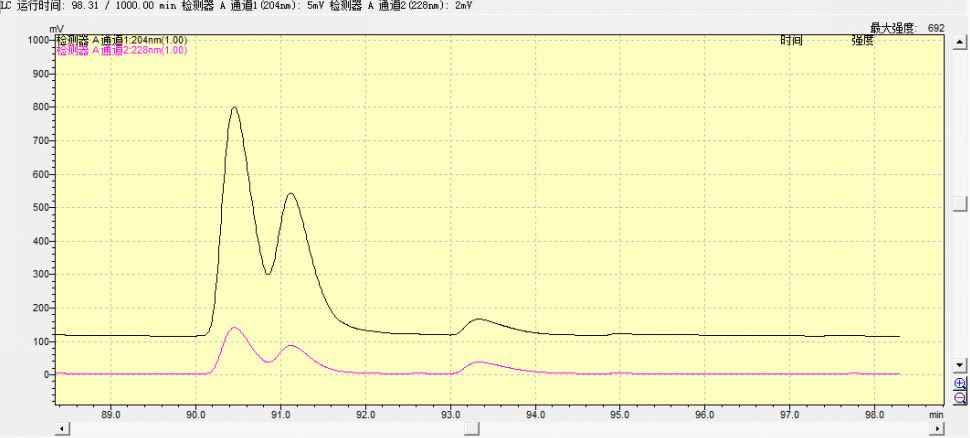


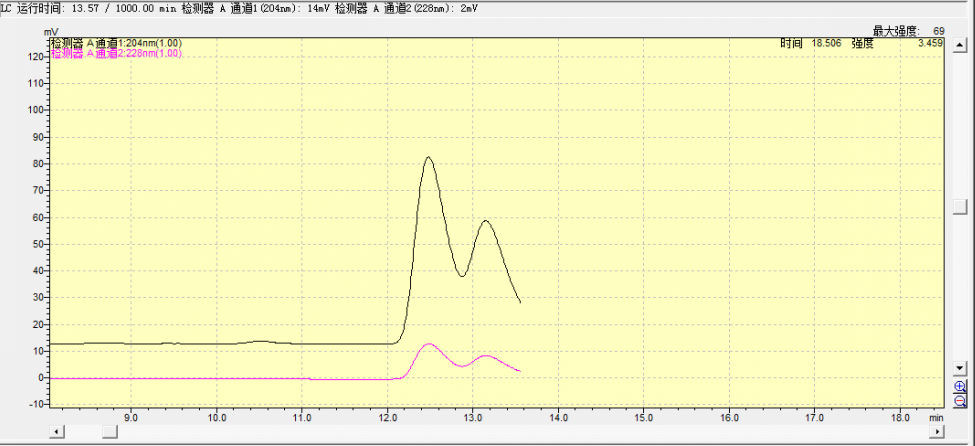


**S23** 1H NMR Spectrum of **1** in Acetone-d6

**
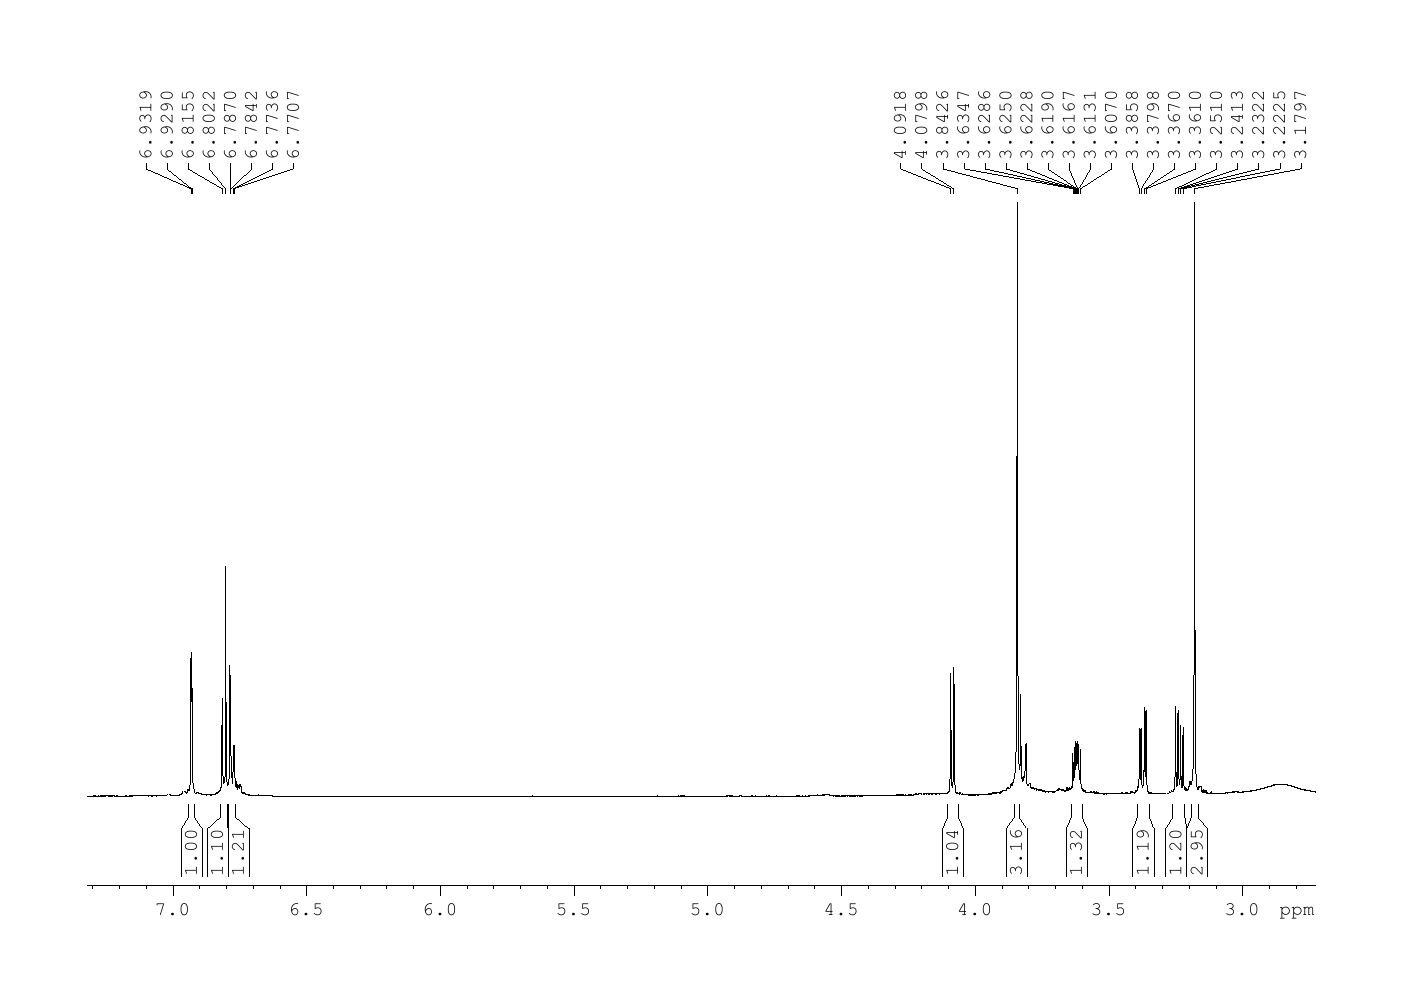
**

**S24** 1H NMR Spectrum of **2** in Acetone-d6

**
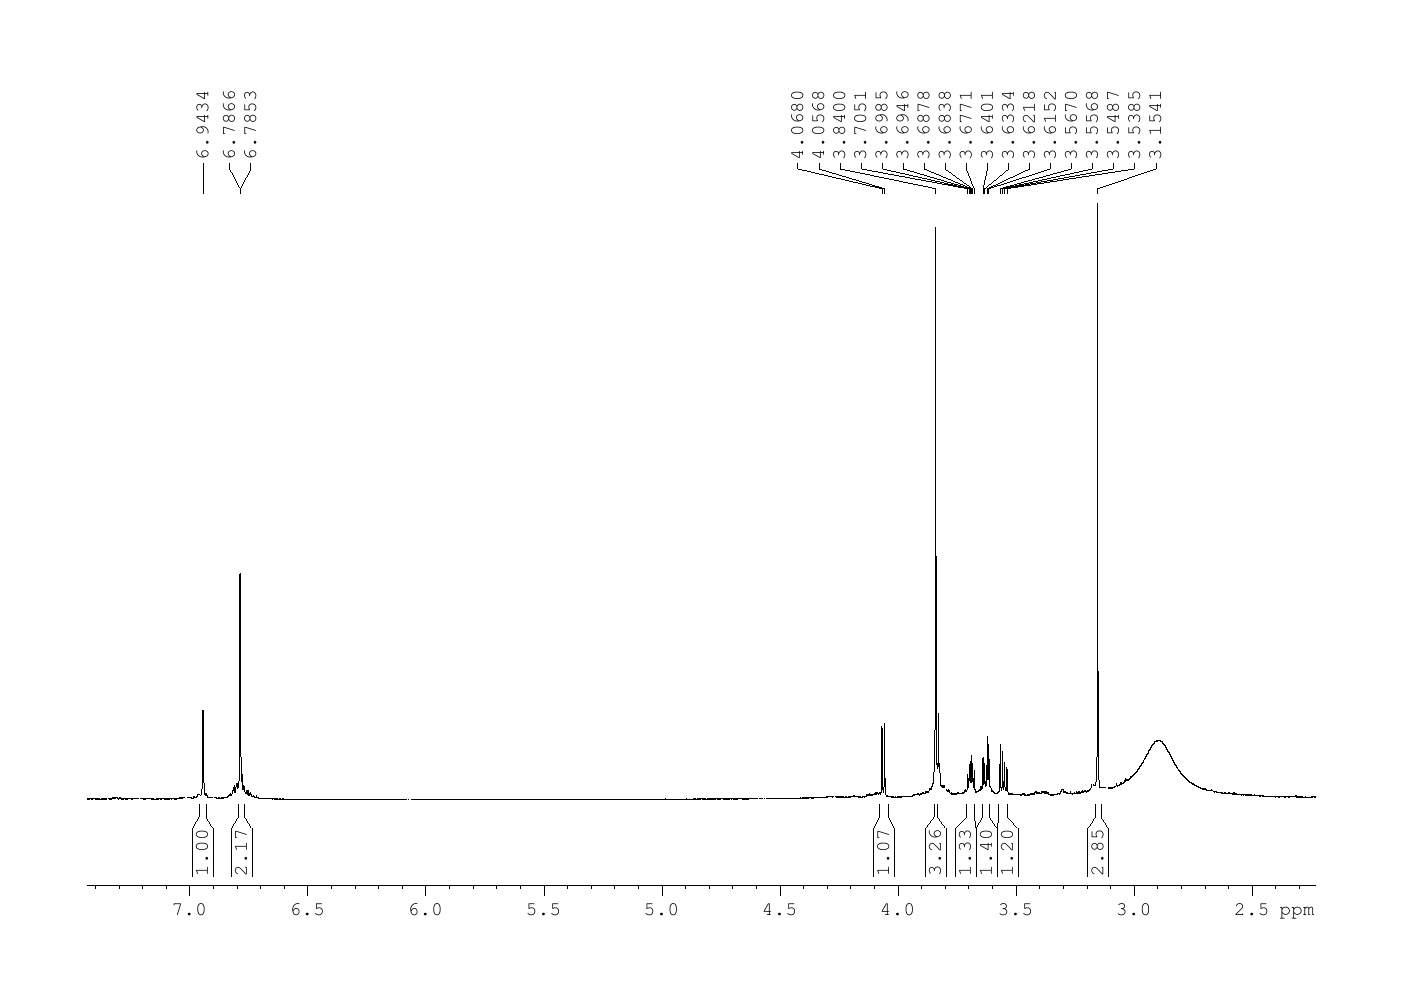
**

**S25** 1H NMR Spectrum of **1** in D2O

**
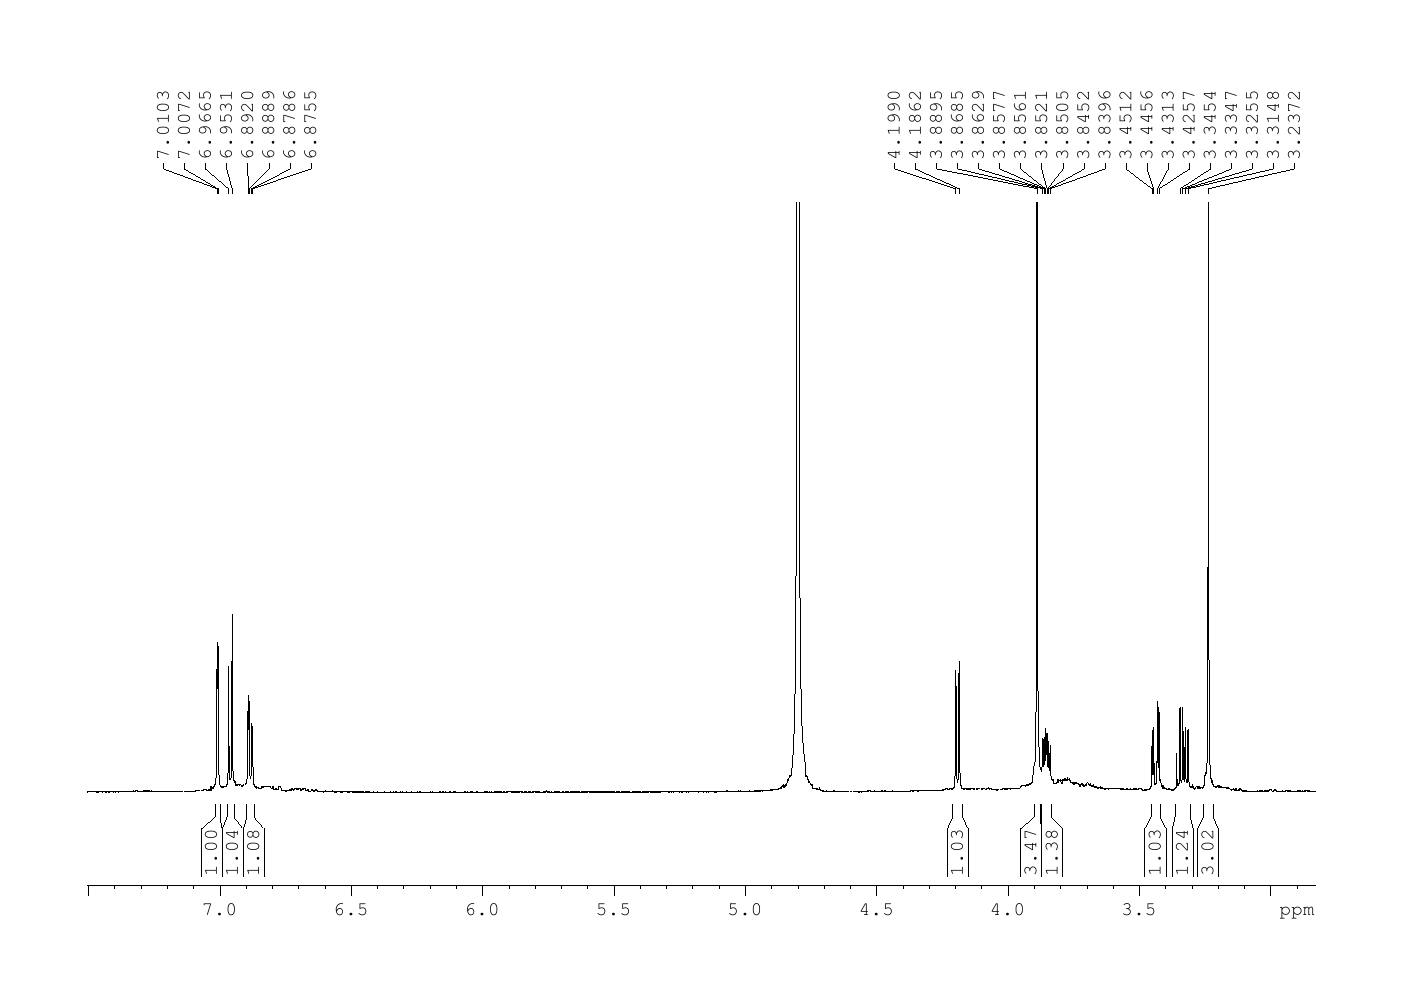
**

**S26** 1H NMR Spectrum of **2** in D2O

**
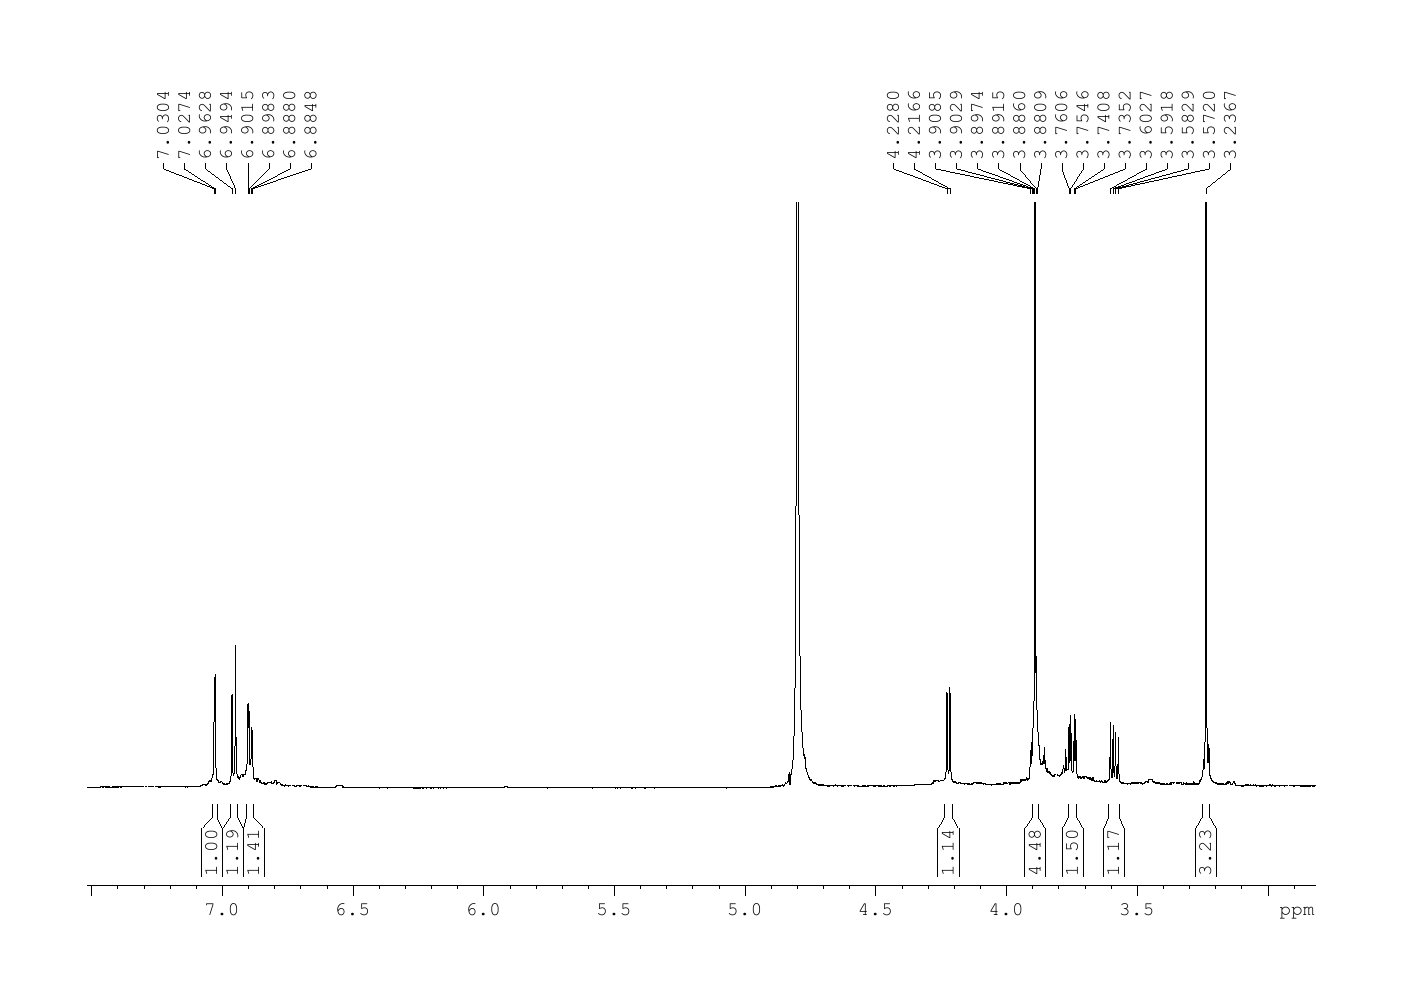
**

**S27** 1H NMR Spectrum of **1** in DMSO-d6

**
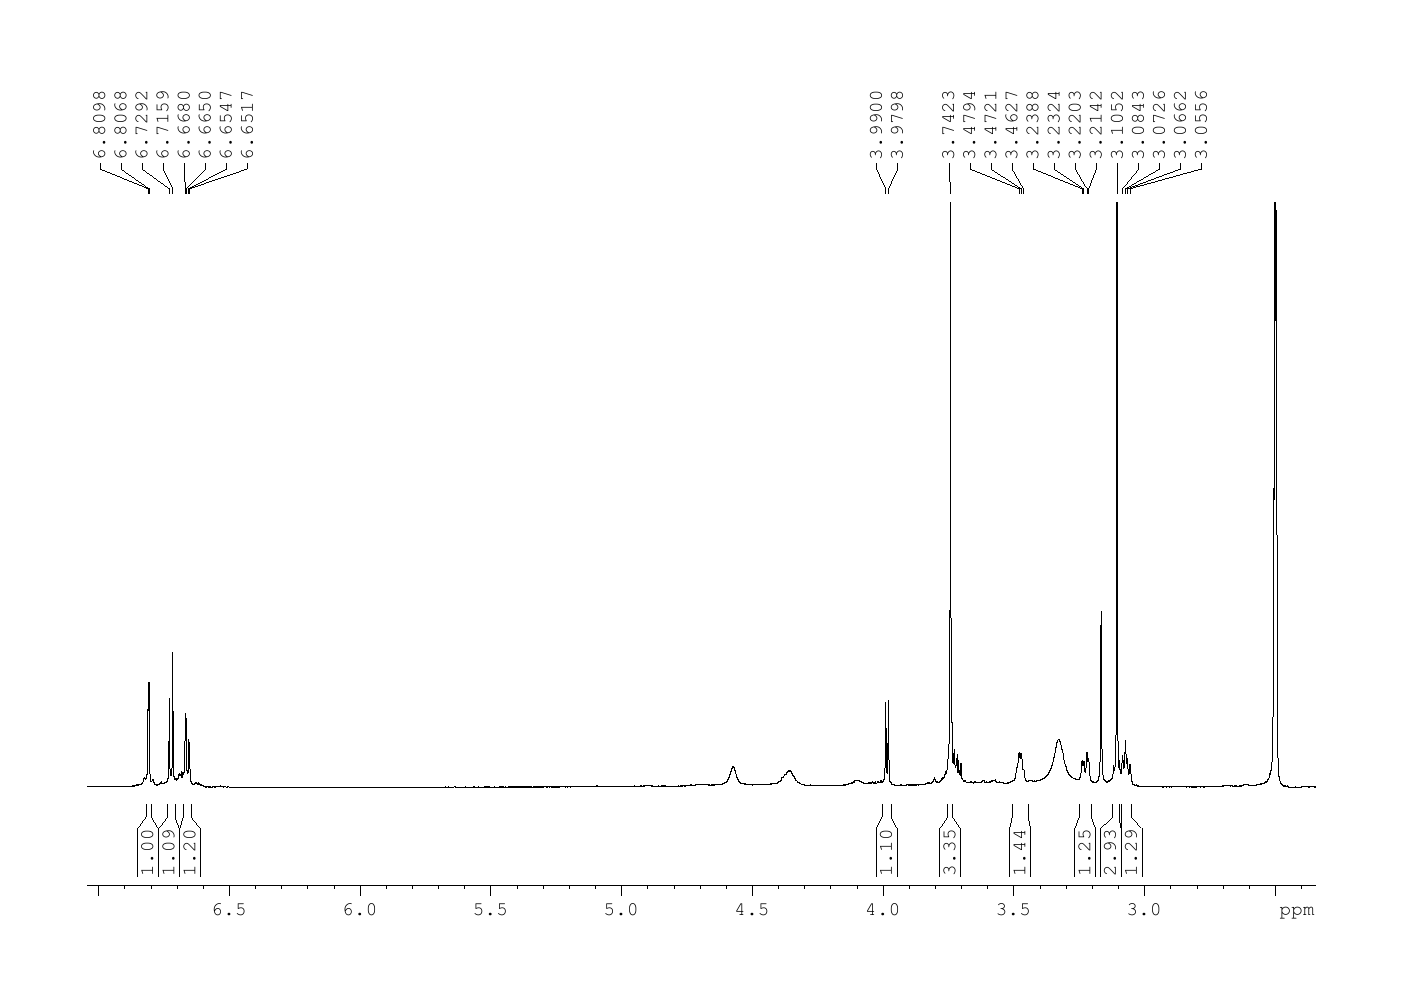
**

**S28** 1H NMR Spectrum of **2** in DMSO-d6

**
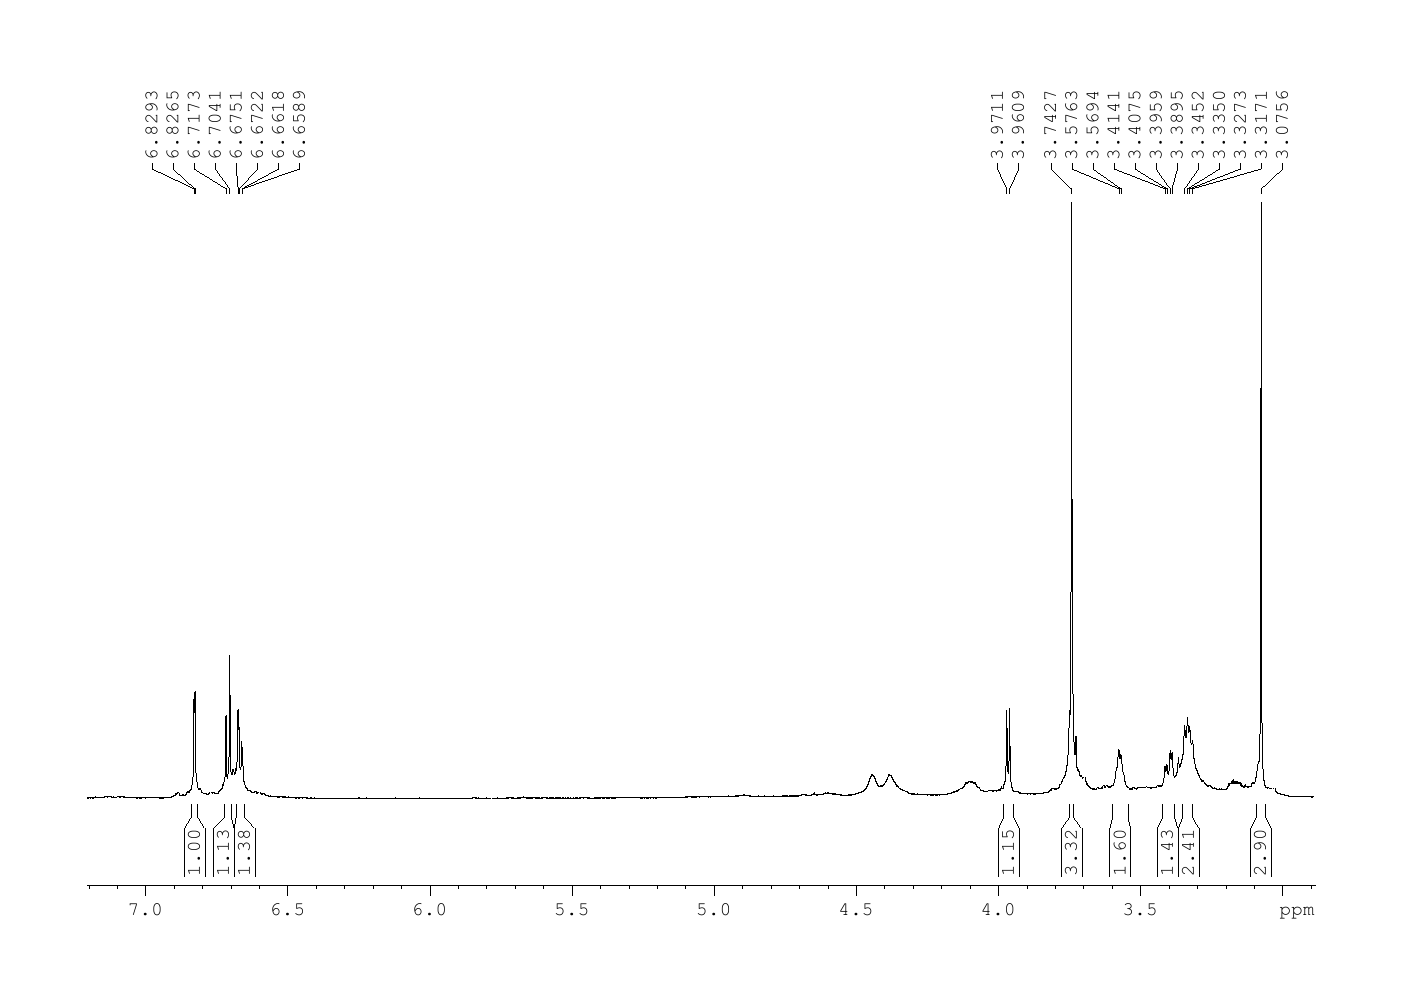
**

**S29** 1H NMR Spectrum of **1** in Pyridine-d5

**
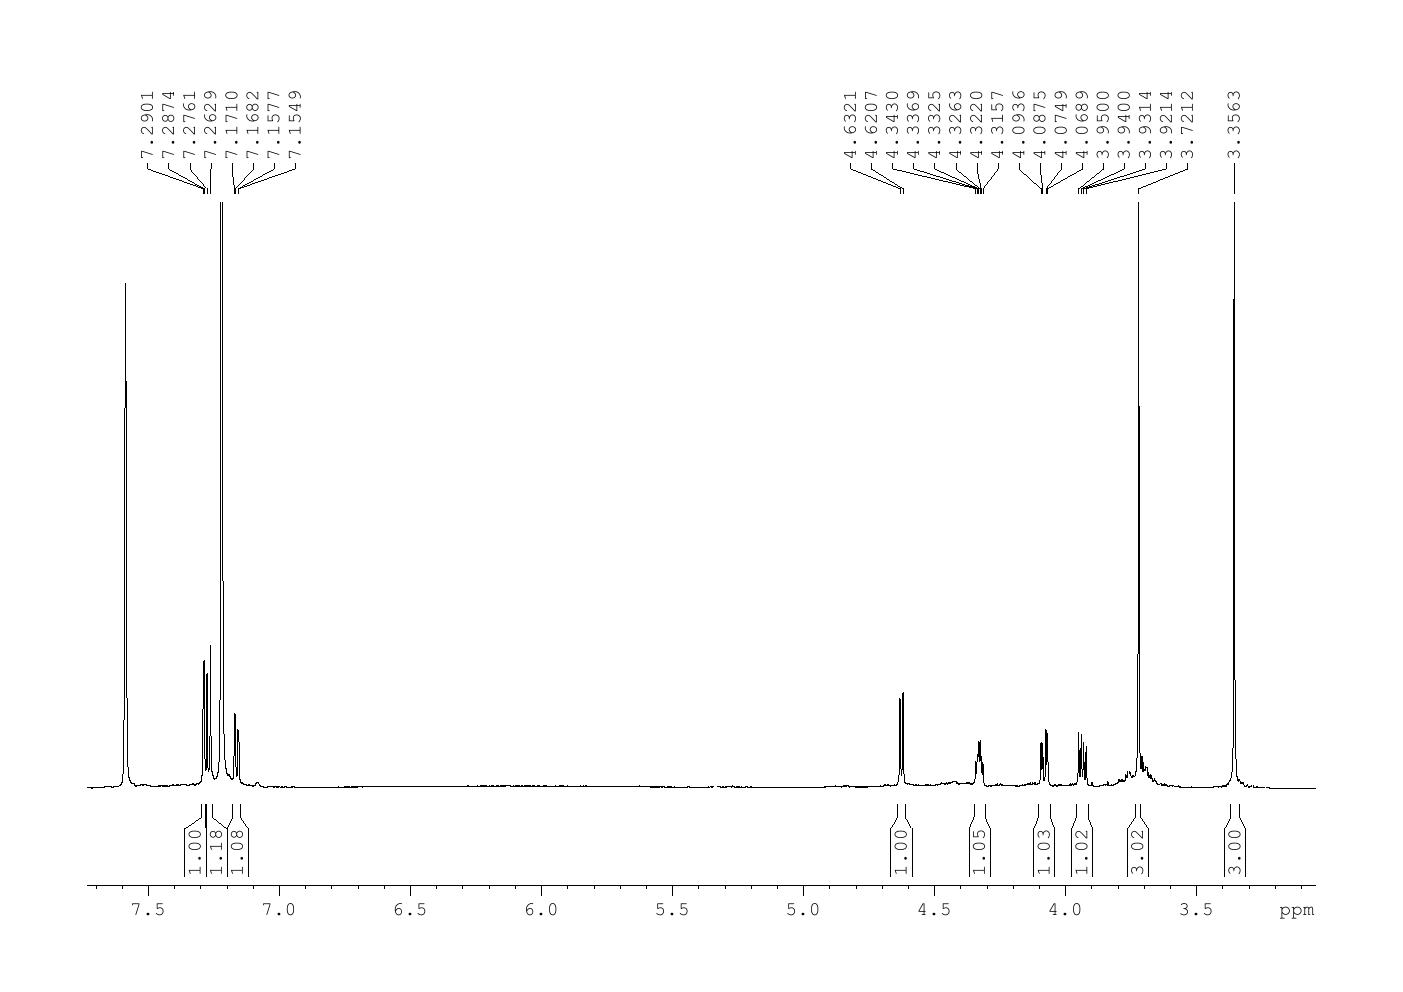
**

**S30** 1H NMR Spectrum of **2** in Pyridine-d5


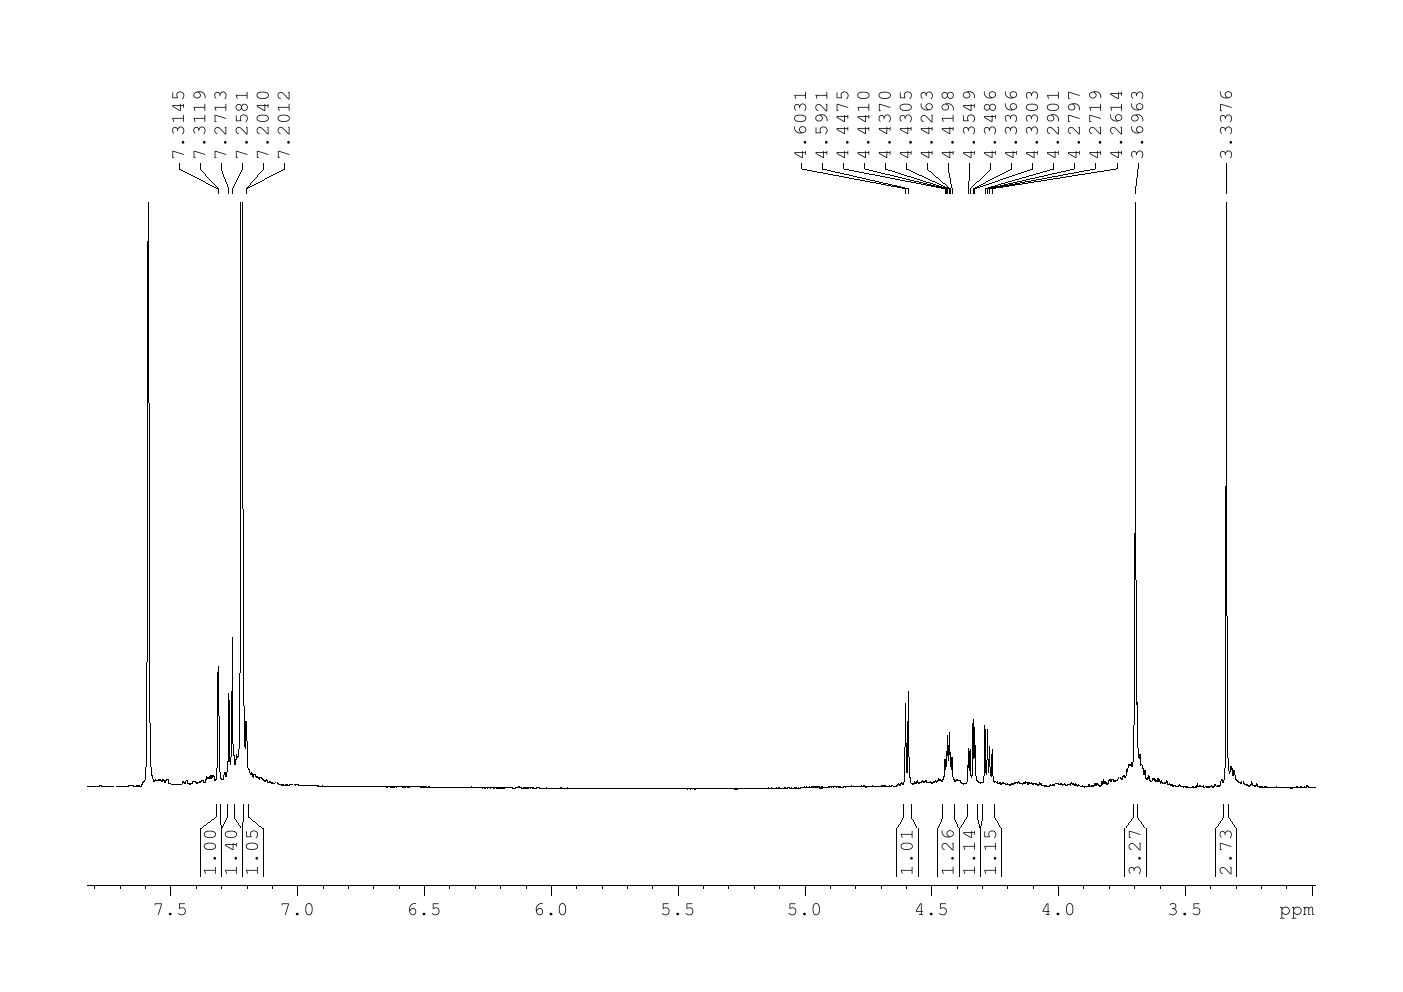

Supplement: Supplementary file 1 [file 12382310]
